# Supplementary material for: Delirium and neuropsychological outcomes in critically Ill patients with COVID-19: a cohort study
Source: PubMed Central journal article supplement — BMJ Open. 2021 Sep 17;11(9):e050045. doi: 10.1136/bmjopen-2021-050045 (PMC8450964; doi:10.1136/bmjopen-2021-050045), 2021-09-17
Supplement: bmjopen-2021-050045.draft_revisions.pdf [file bmjopen-2021-050045.draft_revisions.pdf]

# BMJ Open

BMJ Open is committed to open peer review. As part of this commitment we make the peer review history of every article we publish publicly available.

When an article is published we post the peer reviewers' comments and the authors' responses online. We also post the versions of the paper that were used during peer review. These are the versions that the peer review comments apply to.

The versions of the paper that follow are the versions that were submitted during the peer review process. They are not the versions of record or the final published versions. They should not be cited or distributed as the published version of this manuscript.

BMJ Open is an open access journal and the full, final, typeset and author-corrected version of record of the manuscript is available on our site with no access controls, subscription charges or pay-per-view fees (<http://bmjopen.bmj.com>).

If you have any questions on BMJ Open's open peer review process please email [info.bmjopen@bmj.com](mailto:info.bmjopen@bmj.com)

# BMJ Open

## Delirium and Neuropsychological Outcomes in Critically Ill Patients with COVID-19: an Institutional Case Series

|                               |                                                                                                                                                                                                                                                                                                                                                                                                                                                                                                                                                                                                                         |
|-------------------------------|-------------------------------------------------------------------------------------------------------------------------------------------------------------------------------------------------------------------------------------------------------------------------------------------------------------------------------------------------------------------------------------------------------------------------------------------------------------------------------------------------------------------------------------------------------------------------------------------------------------------------|
| Journal:                      | <i>BMJ Open</i>                                                                                                                                                                                                                                                                                                                                                                                                                                                                                                                                                                                                         |
| Manuscript ID                 | bmjopen-2021-050045                                                                                                                                                                                                                                                                                                                                                                                                                                                                                                                                                                                                     |
| Article Type:                 | Original research                                                                                                                                                                                                                                                                                                                                                                                                                                                                                                                                                                                                       |
| Date Submitted by the Author: | 09-Feb-2021                                                                                                                                                                                                                                                                                                                                                                                                                                                                                                                                                                                                             |
| Complete List of Authors:     | Ragheb, Jacqueline; Michigan Medicine, Anesthesiology<br>McKinney, Amy; Michigan Medicine, Anesthesiology<br>Zierau, Mackenzie; Michigan Medicine, Anesthesiology<br>Brooks, Joseph; Michigan Medicine, Anesthesiology<br>Hill-Caruthers, Maria; Michigan Medicine, Anesthesiology<br>Iskander, Mina; New York Medical College<br>Ahmed, Yusuf; Michigan Medicine, Anesthesiology<br>Lobo, Remy; Michigan Medicine, Radiology<br>Mentz, Graciela; Michigan Medicine, Anesthesiology<br>Vlisides, Phillip E.; Michigan Medicine, Anesthesiology; University of Michigan Medical School, Center for Consciousness Science |
| Keywords:                     | Delirium & cognitive disorders < PSYCHIATRY, COVID-19, Adult intensive & critical care < ANAESTHETICS, Neurological injury < NEUROLOGY                                                                                                                                                                                                                                                                                                                                                                                                                                                                                  |
|                               |                                                                                                                                                                                                                                                                                                                                                                                                                                                                                                                                                                                                                         |

SCHOLARONE™  
Manuscripts

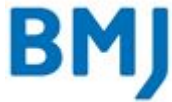

I, the Submitting Author has the right to grant and does grant on behalf of all authors of the Work (as defined in the below author licence), an exclusive licence and/or a non-exclusive licence for contributions from authors who are: i) UK Crown employees; ii) where BMJ has agreed a CC-BY licence shall apply, and/or iii) in accordance with the terms applicable for US Federal Government officers or employees acting as part of their official duties; on a worldwide, perpetual, irrevocable, royalty-free basis to BMJ Publishing Group Ltd ("BMJ") its licensees and where the relevant Journal is co-owned by BMJ to the co-owners of the Journal, to publish the Work in this journal and any other BMJ products and to exploit all rights, as set out in our [licence](#).

The Submitting Author accepts and understands that any supply made under these terms is made by BMJ to the Submitting Author unless you are acting as an employee on behalf of your employer or a postgraduate student of an affiliated institution which is paying any applicable article publishing charge ("APC") for Open Access articles. Where the Submitting Author wishes to make the Work available on an Open Access basis (and intends to pay the relevant APC), the terms of reuse of such Open Access shall be governed by a Creative Commons licence – details of these licences and which [Creative Commons](#) licence will apply to this Work are set out in our licence referred to above.

Other than as permitted in any relevant BMJ Author's Self Archiving Policies, I confirm this Work has not been accepted for publication elsewhere, is not being considered for publication elsewhere and does not duplicate material already published. I confirm all authors consent to publication of this Work and authorise the granting of this licence.

1  
2  
3 **Delirium and Neuropsychological Outcomes in Critically Ill Patients with COVID-**  
4  
5 **19: an Institutional Case Series**  
6  
7  
8  
9

10 Jacqueline Ragheb, MD<sup>1</sup>;† Amy McKinney, MA<sup>1</sup>;† Mackenzie Zierau, BSN<sup>1</sup>; Joseph  
11 Brooks, BS<sup>1</sup>; Maria Hill-Caruthers<sup>1</sup>; Mina Iskander MS<sup>2</sup>; Yusuf Ahmed, BS<sup>1</sup>; Remy Lobo,  
12 MD<sup>3</sup>; Graciela Mentz, PhD<sup>1</sup>; and Phillip E. Vlisides, MD<sup>1,4\*</sup>  
13  
14  
15  
16  
17  
18

19 <sup>1</sup>Department of Anesthesiology, Michigan Medicine, Ann Arbor, MI USA

20 <sup>2</sup>New York Medical College, Valhalla, NY USA

21 <sup>3</sup>Department of Radiology, Michigan Medicine, Ann Arbor, MI USA

22 <sup>4</sup>Center for Consciousness Science, University of Michigan Medical School, Ann Arbor,  
23  
24  
25  
26  
27  
28  
29  
30  
31  
32  
33  
34  
35  
36  
37  
38  
39  
40  
41  
42  
43  
44  
45  
46  
47  
48  
49  
50  
51  
52  
53  
54  
55  
56  
57  
58  
59  
60

MI USA

†These authors contributed equally to the manuscript

Funding statement: This research received no specific grant from any funding agency in  
the public, commercial, or not-for-profit sectors.

Competing interests: None declared.

\*Correspondence:

Dr. Phillip E. Vlisides

Department of Anesthesiology

1  
2  
3  
4  
5  
6  
7  
8  
9  
10  
11  
12  
13  
14  
15  
16  
17  
18  
19  
20  
21  
22  
23  
24  
25  
26  
27  
28  
29  
30  
31  
32  
33  
34  
35  
36  
37  
38  
39  
40  
41  
42  
43  
44  
45  
46  
47  
48  
49  
50  
51  
52  
53  
54  
55  
56  
57  
58  
59  
60

University of Michigan Medical School, 1H247 UH, SPC-5048  
1500 East Medical Center Drive  
Ann Arbor, MI 48109-5048.  
pvliside@med.umich.edu  
Phone: 734-936-4280.

For peer review only

## Abstract

**Objective:** To characterise the clinical course of delirium for patients with Coronavirus Disease 2019 (COVID-19) in the intensive care unit, including post-discharge neuropsychological outcomes.

**Design:** Retrospective chart review and prospective survey study.

**Setting:** Intensive care units, large academic tertiary-care centre (USA).

**Participants:** Patients (n=148) with COVID-19 admitted to an intensive care unit at Michigan Medicine between 1 March 2020 and 31 May 2020 were eligible for inclusion.

**Primary and secondary outcome measures:** Delirium was the primary outcome, assessed via validated chart review method. Secondary outcomes included measures related to delirium, such as delirium duration, antipsychotic use, length of hospital and intensive care unit stay, inflammatory markers, and final disposition. Neuroimaging data were also collected. Lastly, a telephone survey was conducted between 1-2 months after discharge to determine neuropsychological function via the following tests: Family Confusion Assessment Method, Short Blessed Test, Patient-Reported Outcomes Measurement Information System Cognitive Abilities 4a, and Patient-Health Questionnaire-9.

1  
2  
3 **Results:** Delirium was identified in 108/148 (73%) patients, with median (interquartile  
4 range) duration lasting 10 (4 – 17) days. In the delirium cohort, 50% (54/108) of patients  
5 were African American, and delirious patients were more likely to be female (76/108,  
6 70%) (absolute standardized differences >.30). Sedation regimens, inflammation,  
7 delirium prevention protocol deviations, and hypoxic-ischemic injury were likely  
8 contributing factors, and the most common disposition for delirious patients was a  
9 skilled care facility (41/108, 38%). Among patients who were delirious during  
10 hospitalization, 4/17 (24%) later screened positive for delirium at home based on  
11 caretaker assessment, 5/22 (23%) demonstrated signs of questionable cognitive  
12 impairment or cognitive impairment consistent with dementia, and 3/25 (12%) screened  
13 positive for depression within two months after discharge.  
14  
15  
16  
17  
18  
19  
20  
21  
22  
23  
24  
25  
26  
27  
28  
29  
30

31 **Conclusion:** Patients with COVID-19 commonly experience a prolonged course of  
32 delirium in the intensive care unit, likely with multiple contributing factors. Furthermore,  
33 neuropsychological impairment may persist after discharge.  
34  
35  
36  
37  
38  
39  
40  
41  
42  
43  
44  
45  
46  
47  
48  
49  
50  
51  
52  
53  
54  
55  
56  
57  
58  
59  
60

### Strengths and limitations of this study

- The validated chart review method increases confidence in the delirium findings reported.
- Granular details included (i.e., inflammatory profiles, neuroimaging findings, post-discharge neuropsychological function) provide a comprehensive assessment of delirium phenotype in this patient population along with related complications.
- As a single-centre study, findings are restricted to the institution included.
- Many patients were lost to follow-up after hospital discharge.



## Introduction:

The outbreak of Severe Acute Respiratory Syndrome Coronavirus 2 (SARS-CoV-2), the virus that causes Coronavirus Disease (COVID-19), emerged as a public health threat in December 2019 and was declared a pandemic by World Health Organization in March 2020. Major neurological complications, such as encephalopathy, delirium, strokes, seizures, and ataxia, have all been observed.<sup>1-5</sup> Delirium appears to be a common complication, with previous investigations demonstrating an incidence of approximately 65-80% in the intensive care unit (ICU).<sup>1-4</sup> Delirium may occur due to direct coronavirus invasion of the central nervous system,<sup>6</sup> and systemic inflammatory responses may further exacerbate neurocognitive impairment. In the ICU, synergistic factors such as sedation regimen, social isolation, and deviation from standard care protocols may further increase risk. Delirium is also associated with prolonged hospitalization, long-term cognitive and functional impairment, and increased mortality.<sup>7-9</sup> As such, there is a critical need to improve understanding of this syndrome in patients with COVID-19.

While a high incidence of delirium has been reported in COVID-19 patients, fundamental questions persist. The clinical course of delirium, including average duration and post-discharge cognitive trajectory, remains unknown. Pathophysiologic drivers of delirium are incompletely understood, and the extent to which standard prevention protocols are implemented is unclear. Such detailed understanding will contribute to delirium phenotyping of COVID-19 patients and provide insight into the clinical and neurocognitive burden associated with COVID-19. In this context, the

1  
2  
3 objective of this study was to determine granular details associated with delirium in ICU  
4  
5 patients with COVID-19. Specifically, the clinical course of delirium, presence of  
6  
7 exacerbating factors, nature of prevention strategy implementation, and post-discharge  
8  
9 cognitive outcomes were all characterized.  
10  
11  
12  
13  
14  
15  
16  
17  
18  
19  
20  
21  
22  
23  
24  
25  
26  
27  
28  
29  
30  
31  
32  
33  
34  
35  
36  
37  
38  
39  
40  
41  
42  
43  
44  
45  
46  
47  
48  
49  
50  
51  
52  
53  
54  
55  
56  
57  
58  
59  
60

For peer review only

## **Methods:**

### *Study design and overview*

This was a single-centre case series from Michigan Medicine. Detailed chart review data were collected from critically ill patients with COVID-19 (3/1/2020 – 5/31/2020), and post-discharge telephone surveys were conducted to test neuropsychological function after discharge. All study operations were conducted at Michigan Medicine, Ann Arbor MI USA, and approval was obtained from the University of Michigan Medical School Institutional Review Board (HUM00182646). A Health Insurance Portability and Accountability Act waiver was granted in order to retrospectively review patient medical records, and informed consent was not required for retrospective chart review. Patients who agreed to complete telephone surveys after discharge were consented over the telephone prior to survey administration using a comprehensive consent document. A waiver of documentation of consent was approved in conjunction with Institutional Review Board approval and as required by U.S. Department of Health and Human Services regulations and policy. Lastly, the CAse REport guidelines checklist is included in the supplemental online material (Supplemental Table 1). These guidelines provide reporting standards for case reports of one or more patients.<sup>10</sup>

### *Eligibility criteria*

All patients with a COVID-19 diagnosis admitted to a Michigan Medicine ICU between 03/01/2020 – 05/31/2020 were eligible for study inclusion. ICU patients admitted during this time, without a diagnosis of COVID-19, were not eligible for study inclusion.

## Outcomes

The primary outcome was delirium presence (yes/no, %) at any point during admission. Delirium was evaluated via chart review method (described below). Several secondary outcomes were also collected in relation to delirium and overall clinical trajectory. These outcomes included the following: duration of delirium (days), antipsychotic administration, length of hospital stay, length of ICU stay, number of days requiring ventilator support, inflammatory laboratory values (white blood cell count, c-reactive protein, ferritin, lactate dehydrogenase, d-dimer, and interleukin-6), new psychiatry consults, new antidepressant use, and final disposition (e.g., home, long-term care facility, death). Delirium prevention strategies, based on the ABCDEF ICU liberation bundle,<sup>11 12</sup> were also recorded. These included the following: structured mobility exercises, placing familiar objects from home at the bedside, promoting use of visual and hearing aids, and spontaneous awakening/breathing trials. The total number of times a prevention strategy was charted was recorded for each patient, and this number was divided by the *expected* number of times that intervention should have occurred based on length of ICU stay and protocolised schedule. This provided the estimated compliance rate for each intervention. Neuroimaging data were also collected and reviewed.

Lastly, a telephone survey was conducted between 30-60 days post-discharge to determine whether subjective or objective signs of cognitive impairment were present. During telephone interviews, the following tests were conducted: the Patient-Reported Outcomes Measurement Information System (PROMIS)<sup>13</sup> Cognitive Function Abilities

1  
2  
3 4a, Short Blessed Test (score 0-4 = normal cognition, score 5-9 = questionable  
4 impairment, score  $\geq 10$  = impairment consistent with dementia),<sup>14</sup> Family Confusion  
5 Assessment Method (FAM-CAM) for delirium,<sup>15</sup> and the Patient Health Questionnaire-9  
6 (scores  $\geq 10$  were considered positive screens for depression).<sup>16 17</sup>  
7  
8  
9  
10  
11  
12  
13

### 14 *Data collection*

15  
16 Screening for eligible patients was first performed for via DataDirect, a software tool  
17 from the University of Michigan Office of Research that enables research teams to  
18 retrospectively search for patient cohorts. Charts that screened positive were then  
19 manually reviewed by study team members to confirm study eligibility.  
20  
21  
22  
23  
24  
25  
26  
27

28 Charts were then reviewed in further detail for outcome abstraction. Delirium was  
29 assessed via validated, publicly available chart review method.<sup>18</sup> Briefly, any instance of  
30 an acute confusional state was recorded in the instrument and counted as an episode of  
31 delirium. The methodology is drawn from the Confusion Assessment Method,<sup>19</sup> which  
32 assesses for acute changes in cognition, fluctuating course, inattention, altered levels of  
33 consciousness, and disorganized thinking. This was the core set of delirium symptoms  
34 in this cohort, and hyperactive states (e.g., agitation) were reported as well. The source  
35 of information was recorded, along with the date and time. The total number of days  
36 with acute confusion was also included in the instrument, along with any evidence of  
37 reversibility or improvement of the confusion state. Other clinical outcomes, along with  
38 laboratory values, were collected directly from the charts. Neuroimaging studies were  
39  
40  
41  
42  
43  
44  
45  
46  
47  
48  
49  
50  
51  
52  
53  
54  
55  
56  
57  
58  
59  
60

1  
2  
3 manually reviewed by a board certified radiologist with a Certificate of Added  
4  
5 Qualification in neuroradiology (R.L.).  
6  
7  
8  
9

### 10 *Patient and Public Involvement*

11  
12 Neither patients nor the public were involved in this research.  
13  
14  
15

### 16 *Statistical Analysis*

17  
18  
19 Analyses were performed using IBM SPSS version 27 (Armonk, NY USA) and SAS  
20  
21 version 9.4 (SAS Institute, Cary, NC USA). Exploratory data analysis techniques were  
22  
23 used to assess the distribution of dependent measures for determining the appropriate  
24  
25 analytical strategy. The Shapiro-Wilk test was used to assess the distribution of  
26  
27 continuous outcomes, and Independent t-tests or Mann-Whitney U tests were used as  
28  
29 appropriate. Mean (standard deviation) or median (interquartile range) was reported for  
30  
31 parametric and non-parametric data, respectively. For binary outcomes and proportions,  
32  
33 The Chi-Square Test or Fisher's Exact Test were used, as appropriate. Absolute  
34  
35 standardized differences were calculated for determining differences in baseline  
36  
37 characteristics between groups, with differences  $>.20$  considered to be imbalanced. The  
38  
39 threshold for significance was set to  $p<0.05$  across all tests otherwise. For post-  
40  
41 discharge cognitive outcomes, descriptive statistics were reported.  
42  
43  
44  
45  
46  
47  
48  
49  
50  
51  
52  
53  
54  
55  
56  
57  
58  
59  
60

## Results

Baseline characteristics are presented in Table 1. The majority of patients were African-American and non-Hispanic, and the most common comorbidities were hypertension, Diabetes mellitus, and obesity. Absolute standardized differences between delirium and non-delirium groups were largest ( $>.30$ ) for sex, race, and weight. The highest proportion of patients in the delirium group were African-American ( $n=54$ , 50%), and weight was significantly higher in the delirium group (105 [87 – 127] kg vs. 93 [97 – 113] kg,  $P<.05$ ).

### *Delirium and Neuropsychological Outcomes*

Delirium incidence was high in the cohort (108/148, 73%), and median (interquartile range) duration was 10 (4 – 17) days (Table 2). Delirium prevention activities occurred relatively infrequently, with estimated unit protocol compliance rates less than 50% for each intervention reported (see Table 2 legend for description of protocol activity schedule). The mobility exercise activity compliance rate (%) was significantly lower in the delirium group (37% [26 – 55]) compared to the non-delirium group (62% [31 – 152];  $P=.009$ ). Likewise, daily promotion of visual and hearing aids occurred less frequently in the delirium group (27% [13 – 63]) compared to the non-delirium group (77% [14 – 213];  $P=.005$ ). New antidepressant use was more common for those with delirium (27/108, 25%) compared to those without delirium (3/40, 7.5%;  $P=.01$ ). Similarly, a psychiatry consult was obtained for 21/108 (19%) delirious patients compared to 0/40 (0%) in the non-delirium group ( $P=.003$ ). Lastly, no evidence of reversal or improvement was reported for more than 30% of patients during index hospitalization.

### *Hospitalization and Post-Discharge Outcomes*

Median length of hospitalization was 25 (13 – 48) days, and median length of ICU stay was 15 (7 – 31) days across the cohort (Table 3). Length of hospitalization, ICU length of stay, and duration of mechanical ventilation were all significantly prolonged in patients experiencing delirium (Table 3). Correspondingly, sedative-hypnotic use was higher in patients with delirium. Delirious patients demonstrated higher white blood cell counts, c-reactive protein levels, and d-dimer levels compared to non-delirious patients. Less than half of patients were ultimately discharged home, and the most common disposition for those with delirium was a skilled care facility (41/108, 38%) after discharge (Table 3).

Neuropsychological outcomes after discharge are reported in Table 4. Among patients who were still alive and available to complete survey materials, nearly 25% of patients (4/17) scored positive for delirium based on family assessment (FAM-CAM), and all of these patients were delirious during hospitalization. Similarly, approximately 23% of patients (5/22) demonstrated either questionable impairment or impairment consistent with dementia based on the Short Blessed Test, and all five of these patients were also delirious during hospitalization. Of note, three of these five patients also screened positive for delirium based on the FAM-CAM. Lastly, 12% of patients (3/25) screened positive for depression after discharge. The three patients who screened positive also experienced delirium during ICU admission.



### *Neuroradiological Findings*

In total, 47 patients underwent neuroimaging during hospitalization. The majority of imaging results were unremarkable or demonstrated incidental findings unrelated to COVID-19. However, some notable findings were present. A brain MRI was ordered for a patient with COVID-19 pneumonia and worsening encephalopathy (i.e., no response to commands or noxious stimulus). Imaging revealed abnormal fluid attenuated inversion recovery (FLAIR) hyperintensity affecting the occipital and temporal lobes (Figures 1A, 1B), microhemorrhage in the splenium of the corpus callosum (Figures 1B, 1C) and posterior leptomeningeal enhancement (Figures 1C, 1D), suggestive of encephalitis. A brain MRI was ordered for another patient presenting with seizures and recent COVID-19 diagnosis. Results revealed diffuse dural thickening and enhancement (Supplemental Figure 1A) one day prior to positive COVID testing. The differential diagnosis included intracranial hypotension, inflammation, infection, and neoplastic processes. No definitive diagnosis was reached, though this enhancement resolved approximately one month later (Supplemental Figure 1B). Lastly, one patient demonstrated diffuse parenchymal abnormalities on MRI suggestive of bilateral hypoxic-ischemic injury after multiple cardiopulmonary arrests (Supplemental Figure 2). A non-contrast head CT two weeks later demonstrated poor sulcation bilaterally, suggesting global hypoxic-ischemic injury (Supplemental Figure 3).

## Discussion

In a cohort of ICU patients with COVID-19, delirium was a common complication, affecting more than 70% of patients. Furthermore, delirium was associated with prolonged hospitalization, increased length of ICU stay, discharge to skilled care facilities, and positive screens for neuropsychological impairment up to two months after discharge. Delirium occurred in the setting of multiple sedative-hypnotic agents, acute inflammatory responses, deviation from delirium prevention protocols, and cerebrovascular events, which are all factors that could have further catalysed delirium precipitation. ICU liberation activities were infrequently implemented compared to the protocolised frequency expected. Overall, the burden of cognitive impairment was high in patients with COVID-19, as was the risk of related complications.

These results align with previous data demonstrating a high incidence of delirium in critically ill patients with COVID-19.<sup>1-4</sup> Our findings also highlight the multifactorial nature of delirium risk factors. In terms of demographics, 50% of patients in the delirium group were African American. COVID-19 has adversely, and disproportionately, impacted racial and ethnic minority communities,<sup>20 21</sup> and our results further suggest an increased risk of attendant complications (e.g., delirium) during hospitalization. Efforts to reduce racial healthcare disparities may thus, by extension, mitigate risk of delirium and related consequences of COVID-19. Patients experiencing delirium also demonstrated significantly increased weight, and obesity may drive organ dysfunction via immune system dysregulation.<sup>22</sup> Additionally, there was a disproportionate number of female patients in the delirium group (absolute standardized difference >.30). These results are

1  
2  
3 discrepant from a prior case series of critically ill patients with COVID-19 demonstrating  
4 an increased risk of delirium with male patients.<sup>4</sup> Male sex has also been identified as  
5 an independent risk factor for delirium in other patient populations, possibly due to  
6 an independent risk factor for delirium in other patient populations, possibly due to  
7 underlying comorbidity severity.<sup>23 24</sup> Whether the findings in this study are spurious or  
8 reflect an underlying biological phenomenon is unclear. Further investigation is  
9 warranted to improve understanding of the impact that such demographic factors on  
10 delirium risk in patients with COVID-19.  
11  
12  
13  
14  
15  
16  
17  
18  
19  
20

21 Cognitive dysfunction may also occur as a result of direct coronavirus invasion of the  
22 central nervous system<sup>6</sup> or other indirect mechanisms, such as polypharmacy, systemic  
23 inflammatory responses, and cerebrovascular events. Indeed, benzodiazepine sedation  
24 was common in this patient cohort, with nearly 60% of patients receiving midazolam at  
25 one point during ICU admission. Lorazepam was a common sedation agent as well, and  
26 benzodiazepine use is associated with delirium in critically ill patients.<sup>25-27</sup> Whether  
27 benzodiazepine administration served as a driver of delirium, or reflected worsening  
28 agitation (prompting additional sedative agents), remains unclear. Inflammation may  
29 have also contributed to delirium risk. Inflammatory markers (e.g., c-reactive protein,  
30 ferritin, interleukin-6, lactate dehydrogenase) were considerably elevated in this patient  
31 cohort. In fact, serum levels observed in this study aligned with – or exceeded –  
32 previously reported values in patients with severe COVID-19,<sup>25</sup> and there was MRI  
33 evidence of neuroinflammation for at least two patients in this series. C-reactive protein  
34 was elevated in delirious patients, and c-reactive protein increases blood-brain barrier  
35 permeability in basic science models.<sup>28</sup> However, this was an unadjusted, bivariable  
36  
37  
38  
39  
40  
41  
42  
43  
44  
45  
46  
47  
48  
49  
50  
51  
52  
53  
54  
55  
56  
57  
58  
59  
60

1  
2  
3 analysis, and confounding remains possible. Cerebral ischemia may also contribute to  
4 delirium in patients with COVID-19. Severe hypoxic-ischemic injury occurred in a patient  
5 who experienced multiple cardiopulmonary arrests during the course of illness. Stroke  
6 has previously been reported in patients with COVID-19,<sup>29</sup> as thromboembolic  
7 phenomena and cerebral malperfusion may both occur during the clinical course of  
8 COVID-19. Lastly, overall illness severity may increase delirium risk. Indeed, patients  
9 with delirium had prolonged hospital and ICU lengths of stay, longer duration of  
10 mechanical ventilation, and were more likely to require haemodialysis. Overall, multiple  
11 processes likely contribute to delirium in patients with COVID-19. Targeted case-control  
12 studies can be conducted to determine independent risk factors for delirium in this  
13 patient population.  
14  
15  
16  
17  
18  
19  
20  
21  
22  
23  
24  
25  
26  
27  
28  
29  
30

31 Delirium prevention and management are inherently challenging for COVID-19 patients.  
32 While delirium prevention bundles have been demonstrated to reduce risk,<sup>30 31</sup> unique  
33 challenges posed by COVID-19 hinder the implementation of standard prevention  
34 practices. Spontaneous awakening and breathing trials, for example, may not have  
35 been possible due to illness severity and associated ventilator requirements. Clinicians  
36 may have also been limited in terms of sedation regimen. Agitation was commonly  
37 observed, and nearly 30% of patients required antipsychotics in this cohort. Agitation  
38 and hyperactive delirium likely prompted additional sedation and prolonged use of  
39 physical restraints. Early mobility was limited given illness severity, and family  
40 engagement was not possible due to visitor policy restrictions. In-person interactions  
41 with clinicians were also limited given the intent of reducing virus transmission. As such,  
42  
43  
44  
45  
46  
47  
48  
49  
50  
51  
52  
53  
54  
55  
56  
57  
58  
59  
60

1  
2  
3 the culmination of disease severity, limited face-to-face time spent with patients, and  
4 visitor restriction policies likely hindered ICU liberation bundle implementation. Novel  
5 strategies for implementing delirium prevention bundles in this patient population may  
6 help to further mitigate risk and should be tested in prospective trials.  
7  
8  
9

10  
11  
12  
13  
14 Neuropsychological impairment after discharge was also present for some patients  
15 based on subjective reporting, caretaker assessment, and objective testing for  
16 depression and cognitive impairment. Furthermore, all patients that screened positive  
17 for possible impairment also experienced delirium in the hospital. These estimates may  
18 have been even higher, given that many patients called for post-discharge assessments  
19 were unable to be reached, refused participant, or were still admitted to skilled care  
20 facilities. Whether post-discharge cognitive impairment was related specifically to  
21 COVID-19 or critical illness more broadly is unclear. Indeed, cognitive impairment is  
22 common at discharge for patients who experienced delirium while in the ICU, and  
23 delirium is present for nearly 20% of patients newly admitted to acute care facilities.<sup>7 32</sup>  
24  
25 Moreover, cognitive impairment can be present for months-to-years after acute  
26 respiratory distress syndrome and sepsis,<sup>33-35</sup> and symptoms of depression and post-  
27 traumatic stress disorder are commonly reported among ICU survivors.<sup>36</sup>  
28  
29 Neuropsychological impairment after discharge may thus, in part, reflect critical illness,  
30 rather than pathophysiologic insults specific to COVID-19. Nonetheless, ICU patients  
31 with COVID-19 experience considerable neuropsychological burden both during and  
32 after hospitalization. Identifying such vulnerable patients will be important for providing  
33 appropriate longitudinal care and resources.  
34  
35  
36  
37  
38  
39  
40  
41  
42  
43  
44  
45  
46  
47  
48  
49  
50  
51  
52  
53  
54  
55  
56  
57  
58  
59  
60

1  
2  
3  
4  
5  
6 The strengths of this study include granular data with respect to delirium, identification  
7  
8 of potential risk factors, characterization of delirium prevention strategies, and post-  
9  
10 discharge outcomes. Data were representative of an academic tertiary care centre with  
11  
12 nearly 150 patients. A validated, standardized chart review method was used to identify  
13  
14 delirium,<sup>18</sup> and the study measures used to characterize cognitive function, such as the  
15  
16 FAM-CAM, Short Blessed Test, and PROMIS assessments, are standard measures  
17  
18 that increase confidence in the results. In terms of limitations, this is a this was a single-  
19  
20 centre analysis, and the results are restricted to the institution studied. The study was  
21  
22 not conducted with a matched control cohort, as this was a descriptive study. The post-  
23  
24 discharge telephone-based assessments served as screening tools rather than  
25  
26 thorough neuropsychological testing batteries. As such, these post-discharge results  
27  
28 are preliminary and warrant rigorous, follow-up analysis. Additionally,  
29  
30 neuropsychological impairment may have been present at baseline for some patients,  
31  
32 particularly for those with previous neurological disorders. Baseline neuropsychological  
33  
34 testing was not possible for this study. Lastly, data were limited for post-discharge  
35  
36 cognitive outcomes, as more than half of patients called were unavailable to complete  
37  
38 assessments.  
39  
40  
41  
42  
43  
44  
45  
46

47 In summary, delirium is common complication of COVID-19 with multiple contributing  
48  
49 factors. Furthermore, neuropsychological impairment may persist in some patients after  
50  
51 discharge. Further research should aim to identify independent risk factors in this  
52  
53 population and novel, effective prevention strategies.  
54  
55  
56  
57  
58  
59  
60

**Author contributions:**

The study was originally conceived by J.R., A.M., M.Z., and P.E.V. Data acquisition was conducted by J.R., A.M., M.Z., J.B., M.H.C., Y.A., and P.E.V. Data analysis was conducted by J.R., A.M., M.Z., J.B., M.H.C., M.I., Y.A., G.M., and P.E.V. Final statistical analysis was conducted by G.M. and P.E.V. Neuroimaging studies were acquired and analyzed by R.L., and the final neuroimaging figures were generated by R.L. and P.E.V. All authors contributed to the manuscript writing, critically reviewed the manuscript for intellectual content, and approved the final manuscript.

**Acknowledgments:**

We would like to acknowledge Dr. Michael Kenes (PharmD, BCPS, BCCCP) and Ms. Margaret Diehl for assistance with medical chart data extraction.

## References

1. Helms J, Kremer S, Merdji H, et al. Neurologic features in severe SARS-CoV-2 infection. *N Engl J Med* 2020;382(23):2268-70.
2. Mao L, Jin H, Wang M, et al. Neurologic manifestations of hospitalized patients with Coronavirus Disease 2019 in Wuhan, China. *JAMA Neurol* 2020;77(6):683-90.
3. Varatharaj A, Thomas N, Ellul MA, et al. Neurological and neuropsychiatric complications of COVID-19 in 153 patients: a UK-wide surveillance study. *Lancet Psychiatry* 2020;7(10):875-82.
4. Helms J, Kremer S, Merdji H, et al. Delirium and encephalopathy in severe COVID-19: a cohort analysis of ICU patients. *Crit Care* 2020;24(1):491.
5. Liotta EM, Batra A, Clark JR, et al. Frequent neurologic manifestations and encephalopathy-associated morbidity in COVID-19 patients. *Ann Clin Transl Neurol* 2020
6. Bergmann CC, Lane TE, Stohlman SA. Coronavirus infection of the central nervous system: Host-virus stand-off. *Nat Rev Microbiol* 2006;4(2):121-32.
7. Ely EW, Shintani A, Truman B, et al. Delirium as a predictor of mortality in mechanically ventilated patients in the intensive care unit. *JAMA* 2004;291(14):1753-62.
8. Girard TD, Jackson JC, Pandharipande PP, et al. Delirium as a predictor of long-term cognitive impairment in survivors of critical illness. *Crit Care Med* 2010;38(7):1513-20.
9. Brummel NE, Jackson JC, Pandharipande PP, et al. Delirium in the ICU and subsequent long-term disability among survivors of mechanical ventilation. *Crit Care Med* 2014;42(2):369-77.



- 1  
2  
3 10. Gagnier JJ, Kienle G, Altman DG, et al. The CARE guidelines: Consensus-based clinical  
4 case reporting guideline development. *Glob Adv Health Med* 2013;2(5):38-43.  
5  
6
- 7  
8 11. Marra A, Ely EW, Pandharipande PP, et al. The ABCDEF bundle in critical care. *Crit Care*  
9 *Clin* 2017;33(2):225-43.  
10  
11
- 12 12. Pandharipande P, Banerjee A, McGrane S, et al. Liberation and animation for ventilated ICU  
13 patients: the ABCDE bundle for the back-end of critical care. *Crit Care* 2010;14(3):157.  
14  
15
- 16 13. Cella D, Yount S, Rothrock N, et al. The Patient-Reported Outcomes Measurement  
17 Information System (PROMIS): Progress of an NIH roadmap cooperative group during its  
18 first two years. *Med Care* 2007;45(5 Suppl 1):S3-S11.  
19  
20
- 21 14. Katzman R, Brown T, Fuld P, et al. Validation of a short orientation-memory-concentration  
22 test of cognitive impairment. *Am J Psychiatry* 1983;140(6):734-9.  
23  
24
- 25 15. Steis MR, Evans L, Hirschman KB, et al. Screening for delirium using family caregivers:  
26 Convergent validity of the Family Confusion Assessment Method and interviewer-rated  
27 confusion assessment method. *J Am Geriatr Soc* 2012;60(11):2121-6.  
28  
29
- 30 16. Kroenke K, Spitzer RL, Williams JB. The PHQ-9: Validity of a brief depression severity  
31 measure. *J Gen Intern Med* 2001;16(9):606-13.  
32  
33
- 34 17. Levis B, Benedetti A, Thombs BD. Accuracy of Patient Health Questionnaire-9 (PHQ-9) for  
35 screening to detect major depression: Individual participant data meta-analysis. *BMJ*  
36 2019;365:l1476.  
37  
38
- 39 18. Inouye SK, Leo-Summers L, Zhang Y, et al. A chart-based method for identification of  
40 delirium: Validation compared with interviewer ratings using the confusion assessment  
41 method. *J Am Geriatr Soc* 2005;53(2):312-8.  
42  
43  
44  
45  
46  
47  
48  
49  
50  
51  
52  
53  
54  
55  
56  
57  
58

- 1  
2  
3 19. Inouye SK, van Dyck CH, Alessi CA, et al. Clarifying confusion: The Confusion Assessment  
4 Method. a new method for detection of delirium. *Ann Intern Med* 1990;113(12):941-8.  
5  
6  
7  
8 20. Price-Haywood EG, Burton J, Fort D, et al. Hospitalization and mortality among black  
9 patients and white patients with COVID-19. *N Engl J Med* 2020;382(26):2534-43.  
10  
11  
12  
13 21. Millett GA, Jones AT, Benkeser D, et al. Assessing differential impacts of COVID-19 on  
14 black communities. *Ann Epidemiol* 2020;47:37-44.  
15  
16  
17  
18 22. Huizinga GP, Singer BH, Singer K. The collision of meta-inflammation and SARS-CoV-2  
19 pandemic infection. *Endocrinology* 2020;161(11)  
20  
21  
22  
23 23. Oh ES, Sieber FE, Leoutsakos JM, et al. Sex differences in hip fracture surgery:  
24 Preoperative risk factors for delirium and postoperative outcomes. *J Am Geriatr Soc*  
25 2016;64(8):1616-21.  
26  
27  
28  
29 24. Elie M, Cole MG, Primeau FJ, et al. Delirium risk factors in elderly hospitalized patients. *J*  
30  
31  
32  
33  
34  
35  
36 25. Pisani MA, Murphy TE, Araujo KL, et al. Benzodiazepine and opioid use and the duration of  
37 intensive care unit delirium in an older population. *Crit Care Med* 2009;37(1):177-83.  
38  
39  
40  
41 26. Zaal IJ, Devlin JW, Hazelbag M, et al. Benzodiazepine-associated delirium in critically ill  
42 adults. *Intensive Care Med* 2015;41(12):2130-7.  
43  
44  
45  
46 27. Pandharipande P, Shintani A, Peterson J, et al. Lorazepam is an independent risk factor for  
47 transitioning to delirium in intensive care unit patients. *Anesthesiology* 2006;104(1):21-6.  
48  
49  
50  
51 28. Hsuchou H, Kastin AJ, Mishra PK, et al. C-reactive protein increases BBB permeability:  
52 Implications for obesity and neuroinflammation. *Cell Physiol Biochem* 2012;30(5):1109-19.  
53  
54  
55  
56  
57  
58  
59  
60

- 1  
2  
3 29. Ntaios G, Michel P, Georgiopoulos G, et al. Characteristics and outcomes in patients with  
4 COVID-19 and acute ischemic stroke: The Global COVID-19 Stroke Registry. *Stroke*  
5 2020;51(9):e254-e58.  
6  
7  
8  
9  
10 30. Ely EW. The ABCDEF bundle: Science and philosophy of how ICU liberation serves patients  
11 and families. *Crit Care Med* 2017;45(2):321-30.  
12  
13  
14  
15 31. Barnes-Daly MA, Phillips G, Ely EW. Improving hospital survival and reducing brain  
16 dysfunction at seven california community hospitals: Implementing PAD guidelines via the  
17 ABCDEF bundle in 6,064 patients. *Crit Care Med* 2017;45(2):171-78.  
18  
19  
20  
21  
22 32. Kiely DK, Bergmann MA, Murphy KM, et al. Delirium among newly admitted postacute  
23 facility patients: Prevalence, symptoms, and severity. *J Gerontol A Biol Sci Med Sci*  
24 2003;58(5):M441-5.  
25  
26  
27  
28  
29  
30 33. Hopkins RO, Weaver LK, Collingridge D, et al. Two-year cognitive, emotional, and quality-  
31 of-life outcomes in acute respiratory distress syndrome. *Am J Respir Crit Care Med*  
32 2005;171(4):340-7.  
33  
34  
35  
36  
37 34. Ehlenbach WJ, Hough CL, Crane PK, et al. Association between acute care and critical  
38 illness hospitalization and cognitive function in older adults. *JAMA* 2010;303(8):763-70.  
39  
40  
41  
42 35. Iwashyna TJ, Ely EW, Smith DM, et al. Long-term cognitive impairment and functional  
43 disability among survivors of severe sepsis. *JAMA* 2010;304(16):1787-94.  
44  
45  
46  
47  
48 36. Hatch R, Young D, Barber V, et al. Anxiety, depression and post traumatic stress disorder  
49 after critical illness: a UK-wide prospective cohort study. *Crit Care* 2018;22(1):310.  
50  
51  
52  
53  
54  
55  
56  
57  
58  
59  
60

1  
2  
3 **Figure 1.** Axial fluid-attenuated inversion recovery (FLAIR) (A, B) images at the level of the basal ganglia  
4 show abnormal FLAIR hyperintense signal (arrows) affecting the bilateral occipital, temporal lobes. This  
5 appears almost sulcal suggesting a higher protein component within the cerebrospinal fluid. Note the  
6 elevated FLAIR signal in the splenium of the corpus callosum (arrow) suggesting parenchymal insult.  
7 Axial susceptibility weighted imaging (SWI) (C) at the level of the splenium of the corpus callosum shows  
8 small areas of susceptibility (arrow) in the splenium, likely related to microhemorrhage. Axial T1 (D) post-  
9 contrast with fat suppression at the level of the basal ganglia shows subtle, though true, enhancement  
10 (arrows) in the posterior sulci, arachnoid pial (leptomeningeal) pattern suggesting a degree of  
11 encephalitis.  
12  
13  
14  
15  
16  
17  
18  
19  
20  
21  
22  
23  
24  
25  
26  
27  
28  
29  
30  
31  
32  
33  
34  
35  
36  
37  
38  
39  
40  
41  
42  
43  
44  
45  
46  
47  
48  
49  
50  
51  
52  
53  
54  
55  
56  
57  
58  
59  
60

**Table 1.** Baseline Characteristics

|                                 | <b>All Patients<br/>(n=148)</b> | <b>Delirium<br/>(n=108)</b> | <b>No Delirium<br/>(n=40)</b> | <b>Absolute<br/>Standardized<br/>Difference</b> |
|---------------------------------|---------------------------------|-----------------------------|-------------------------------|-------------------------------------------------|
| <b>Age (IQR)</b>                | 59 (49 – 71)                    | 58 (47 – 71)                | 62 (54 – 71)                  | .26                                             |
| <b>Male sex, n (%)</b>          | 98 (66)                         | 32 (30)                     | 18 (45)                       | .32                                             |
| <b>Race, n (%)</b>              |                                 |                             |                               | .32                                             |
| Caucasian                       | 66 (45)                         | 47 (44)                     | 19 (48)                       |                                                 |
| African-American                | 70 (47)                         | 54 (50)                     | 16 (40)                       |                                                 |
| Other                           | 1 (0.7)                         | 1 (0.9)                     | 0 (0)                         |                                                 |
| Not reported                    | 11 (7.4)                        | 6 (5.6)                     | 5 (13)                        |                                                 |
| <b>Ethnicity, n (%)</b>         |                                 |                             |                               | .31                                             |
| Non-Hispanic                    | 137 (93)                        | 100 (93)                    | 38 (93)                       |                                                 |
| Hispanic                        | 5 (3.4)                         | 5 (4.7)                     | 0 (0)                         |                                                 |
| Unknown/not<br>reported         | 6 (4.1)                         | 3 (2.8)                     | 3 (7.5)                       |                                                 |
| <b>Weight, kg (IQR)</b>         | 103 (83 – 127)                  | 105 (87 – 127)              | 93 (79 – 113)                 | .36                                             |
| <b>BMI (IQR)</b>                | 34 (28 – 40)                    | 34 (29 – 41)                | 31 (28 – 39)                  | .16                                             |
| <b>Comorbidities,<br/>n (%)</b> |                                 |                             |                               |                                                 |
| Asthma                          | 24 (16)                         | 17 (16)                     | 7 (18)                        | .05                                             |
| Atrial fibrillation             | 22 (15)                         | 14 (13)                     | 8 (20)                        | .19                                             |
| Cancer                          | 25 (17)                         | 20 (19)                     | 5 (13)                        | .17                                             |
| Chronic kidney<br>disease       | 40 (27)                         | 30 (28)                     | 10 (25)                       | .06                                             |
| Congestive heart<br>failure     | 19 (13)                         | 13 (12)                     | 6 (15)                        | .09                                             |

|                          |          |         |         |     |
|--------------------------|----------|---------|---------|-----|
| COPD                     | 14 (9.5) | 8 (7.4) | 6 (15)  | .24 |
| Coronary artery disease  | 27 (18)  | 18 (17) | 9 (23)  | .15 |
| Depression               | 17 (11)  | 11 (10) | 6 (15)  | .15 |
| Diabetes mellitus        | 75 (51)  | 58 (54) | 18 (43) | .23 |
| Hypertension             | 102 (69) | 74 (66) | 29 (70) | .03 |
| Obstructive sleep apnoea | 31 (21)  | 22 (20) | 9 (23)  | .05 |
| Seizures                 | 8 (5.4)  | 5 (4.6) | 3 (7.5) | .12 |
| Stroke                   | 9 (6.1)  | 5 (4.6) | 4 (10)  | .21 |
| Substance abuse          | 9 (6.1)  | 6 (5.6) | 3 (7.5) | .21 |
| TIA                      | 5 (3.4)  | 3 (2.8) | 2 (5)   | .12 |

Median (interquartile range, IQR) data presented. *Kg* kilograms, *BMI* body mass index, *COPD* chronic obstructive pulmonary disease, *TIA* transient ischemic attack.

**Table 2.** Delirium and Neuropsychological Outcomes

|                                                                        | <b>All Patients<br/>(n=148)</b> | <b>Delirium<br/>(n=108)</b> | <b>No Delirium<br/>(n=40)</b> | <b>P Values</b> |
|------------------------------------------------------------------------|---------------------------------|-----------------------------|-------------------------------|-----------------|
| <b>Delirium measures</b>                                               |                                 |                             |                               |                 |
| Delirium, n (%)                                                        | 108 (73)                        | 108 (100)                   | ---                           | ---             |
| Duration of delirium, days<br>(IQR)                                    | 10 (4 – 17)                     | 10 (4 – 17)                 | ---                           | ---             |
| Agitation (n, %)                                                       | --                              | 54 (50)                     | --                            | --              |
| Antipsychotic use, n (%)                                               | 43 (29%)                        | 42 (39)                     | 1 (2.5)                       | <.001           |
| Evidence of reversal, n (%)                                            | ---                             | 71 (66)                     | ---                           | ---             |
| <b>ICU liberation bundle<br/>activity compliance rate, %<br/>(IQR)</b> |                                 |                             |                               |                 |
| Mobility exercises                                                     | 40 (28 – 67)                    | 37 (26 – 55)                | 62 (31 – 152)                 | .009            |
| Familiar objects at bedside                                            | 14 (4.4 – 31)                   | 14 (5.9 – 25)               | 18 (0 – 62)                   | .38             |
| Daily visual and hearing aids                                          | 33 (13 – 76)                    | 27 (13 – 63)                | 77 (14 – 213)                 | .005            |
| Daily spontaneous<br>awakening/breathing trials                        | 14 (2.3 – 25)                   | 14 (7.9 – 25)               | 6.7 (0 – 23)                  | .07             |
| <b>Psychiatric outcomes</b>                                            |                                 |                             |                               |                 |
| New antidepressant use, n<br>(%)                                       | 30 (20)                         | 27 (25)                     | 3 (7.5)                       | .01             |
| New psychiatry consults, n<br>(%)                                      | 21 (14)                         | 21 (19)                     | 0 (0)                         | .003            |

Delirium prevention measures are based on the standard ICU liberation bundle protocols (see text for details). Per institutional protocol, clinicians conduct mobility exercises three times daily, place familiar objects at the bedside once daily, promote visual and hearing aid use daily, and conduct daily spontaneous awakening/breathing trials daily (if eligible). Given this schedule, compliance/occurrence

1  
2  
3 rates (%) were calculated for each patient by calculating the total number of activities charted divided by  
4 the total number expected based on length of ICU stay (day of ICU discharge was not counted). *IQR*,  
5 interquartile range.  
6  
7  
8  
9  
10  
11  
12  
13  
14  
15  
16  
17  
18  
19  
20  
21  
22  
23  
24  
25  
26  
27  
28  
29  
30  
31  
32  
33  
34  
35  
36  
37  
38  
39  
40  
41  
42  
43  
44  
45  
46  
47  
48  
49  
50  
51  
52  
53  
54  
55  
56  
57  
58  
59  
60

For peer review only



**Table 3.** Hospitalization

|                                                   | <b>All Patients<br/>(n=148)</b> | <b>Delirium<br/>(n=108)</b> | <b>No Delirium<br/>(n=40)</b> | <b>P Value</b> |
|---------------------------------------------------|---------------------------------|-----------------------------|-------------------------------|----------------|
| <b>Length of hospitalization, days (IQR)</b>      | 25 (13 – 48)                    | 31 (18 – 52)                | 11 (7 – 25)                   | <.001          |
| <b>Length of ICU stay, days (IQR)</b>             | 15 (7 – 31)                     | 19 (12 – 38)                | 4 (2 – 8)                     | <.001          |
| <b>Ventilator time, days, (IQR)</b>               | 12 (3 – 28)                     | 18 (10 – 29)                | 0 (0 – 7)                     | <.001          |
| <b>Required haemodialysis, n (%)</b>              | 45 (30)                         | 40 (37)                     | 5 (13)                        | .004           |
| <b>Sedative-hypnotics, n (%)</b>                  |                                 |                             |                               |                |
| Propofol                                          | 113 (76)                        | 98 (91)                     | 15 (38)                       | <.001          |
| Midazolam                                         | 87 (59)                         | 75 (69)                     | 12 (30)                       | <.001          |
| Dexmedetomidine                                   | 97 (66)                         | 89 (82)                     | 8 (20)                        | <.001          |
| Lorazepam                                         | 58 (39)                         | 52 (49)                     | 6 (15)                        | <.001          |
| <b>Laboratories</b>                               |                                 |                             |                               |                |
| WBC<br>(n=148)<br>4.0 – 10.0 (K/ $\mu$ L)         | 10.1 (7.8 – 13.9)               | 11.3 (8.4 – 15.1)           | 8.7 (6.3 – 10.9)              | .002           |
| C-reactive protein<br>(n=145)<br>1.0 – 3.0 (mg/L) | 10.2 (5.1 – 18.0)               | 11.7 (5.3 – 20.7)           | 8.9 (4.3 – 13.9)              | .03            |
| Ferritin<br>(n=147)                               | 1,208 (591 – 1,786)             | 1276 (714 – 1990)           | 994 (478 – 1406)              | .09            |

|                                                         |                        |                        |                    |      |
|---------------------------------------------------------|------------------------|------------------------|--------------------|------|
| 18.0 – 320.0 (ng/mL)                                    |                        |                        |                    |      |
| Lactate<br>dehydrogenase<br>(n=135)<br>120 – 240 (IU/L) | 455 (328 – 572)        | 458 (343 – 633)        | 398 (276 – 515)    | .05  |
| IL-6<br>(n=52)<br>< 17.4 pg/mL                          | 69.4 (27.5 –<br>201.3) | 69.4 (32.6 –<br>186.7) | 62.7 (19.9 – 361)  | .77  |
| D-dimer<br>(n=142)<br>< 0.59 mg/L                       | 3.1 (1.5 – 6.8)        | 3.67 (1.84 – 7.75)     | 1.65 (1.27 – 4.41) | .002 |
| <b>Disposition, n (%)</b>                               |                        |                        |                    | .03  |
| Home (unassisted)                                       | 62 (42)                | 40 (37)                | 22 (55)            |      |
| Skilled care facility                                   | 47 (32)                | 41 (38)                | 6 (15)             |      |
| Death                                                   | 39 (26)                | 27 (25)                | 12 (30)            |      |

Institutional reference ranges are reported for laboratory values. *ICU* intensive care unit, *IQR* interquartile range, *WBC* white blood cell count, *IL-6* interleukin-6.

**Table 4.** Post-Discharge Neuropsychological Outcomes†

|                                                                               | <b>All Patients<br/>(n=148)</b> | <b>Delirium<br/>(n=108)</b> | <b>No Delirium<br/>(n=40)</b> |
|-------------------------------------------------------------------------------|---------------------------------|-----------------------------|-------------------------------|
| Positive FAM-CAM, n (%)<br>(n=17)                                             | 4 (24)                          | 4 (31)                      | 0 (0)                         |
| PROMIS 4A Cognitive<br>Abilities Score, median<br>(IQR)<br>(n=25)             | 16 (10 – 20)                    | 17 (9 – 20)                 | 14 (6)                        |
| Short Blessed Test –<br>Normal, n (%)<br>(n=22)                               | 17 (74)                         | 10 (67)                     | 7 (100)                       |
| Short Blessed Test –<br>questionable cognitive<br>impairment, n (%)<br>(n=22) | 2 (8.7)                         | 2 (13)                      | 0 (0)                         |
| Short Blessed Test –<br>cognitive impairment, n (%)<br>(n=22)                 | 3 (13)                          | 3 (20)                      | 0 (0)                         |
| PHQ-9 screen positive, n,<br>(%)<br>(n=25)                                    | 3 (12)                          | 3 (17)                      | 0 (0)                         |

*FAM-CAM* Family-based Confusion Assessment Method for delirium, *PROMIS* Patient-Reported Outcomes Measurement Information System, *PHQ* Patient Health Questionnaire. †For each post-discharge survey, proportions are calculated based on the total numbers of surveys completed. In total, 25 surveys were completed for the PROMIS 4A test, 25 surveys were completed for the PHQ-9, 17 surveys were completed for the FAM-CAM, and 22 surveys were completed for the Short Blessed Test.

1  
2  
3 Reasons for not completing a test included the following: unable to contact (n=54), patient deceased  
4  
5 (n=43), refusal (n=18), unable to provide consent (n=5), and admission to skilled care facility (n=3).  
6  
7  
8  
9  
10  
11  
12  
13  
14  
15  
16  
17  
18  
19  
20  
21  
22  
23  
24  
25  
26  
27  
28  
29  
30  
31  
32  
33  
34  
35  
36  
37  
38  
39  
40  
41  
42  
43  
44  
45  
46  
47  
48  
49  
50  
51  
52  
53  
54  
55  
56  
57  
58  
59  
60

For peer review only

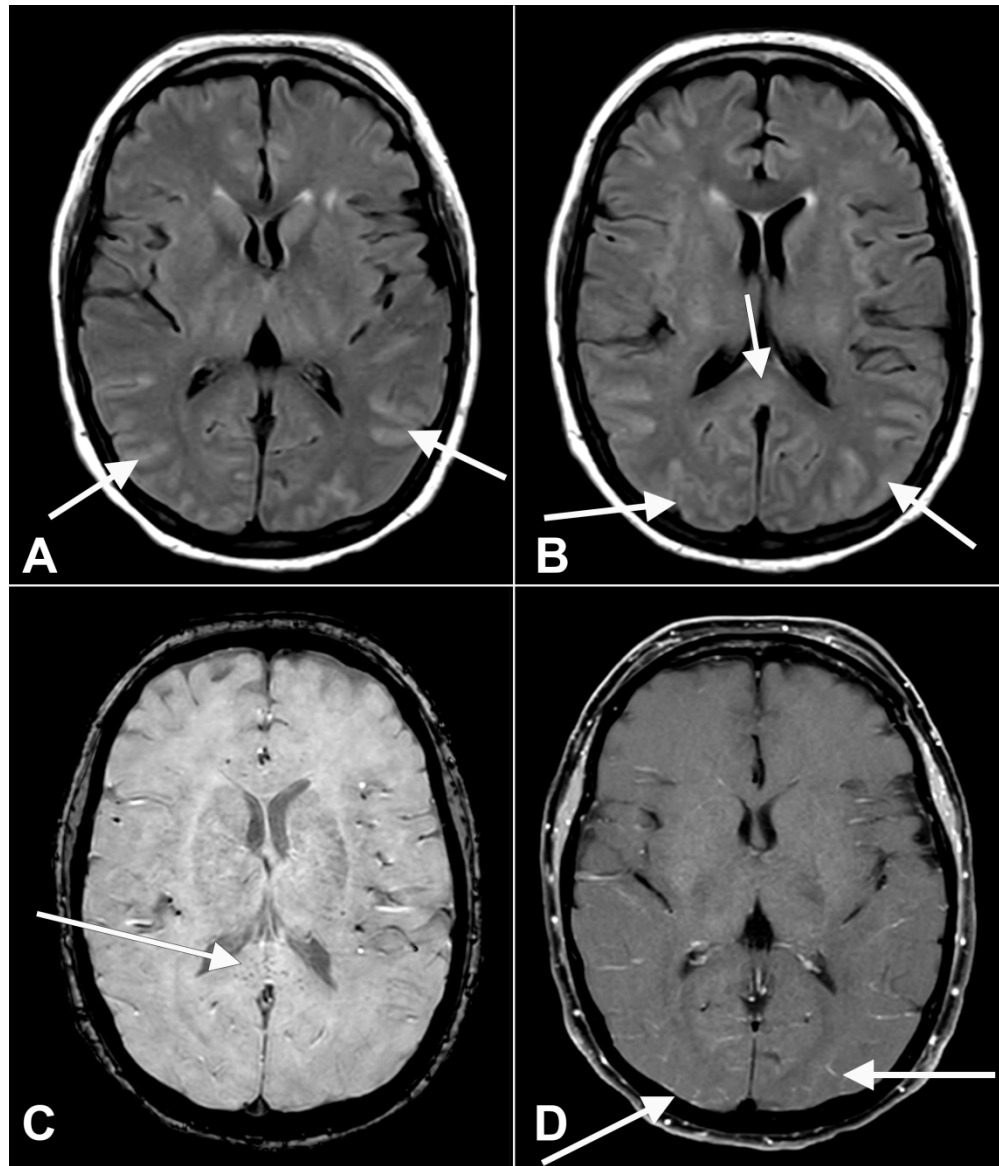

Figure 1 - Axial fluid-attenuated inversion recovery (FLAIR) (A, B) images at the level of the basal ganglia show abnormal FLAIR hyperintense signal (arrows) affecting the bilateral occipital, temporal lobes. This appears almost sulcal suggesting a higher protein component within the cerebrospinal fluid. Note the elevated FLAIR signal in the splenium of the corpus callosum (arrow) suggesting parenchymal insult. Axial susceptibility weighted imaging (SWI) (C) at the level of the splenium of the corpus callosum shows small areas of susceptibility (arrow) in the splenium, likely related to microhemorrhage. Axial T1 (D) post-contrast with fat suppression at the level of the basal ganglia shows subtle, though true, enhancement (arrows) in the posterior sulci, arachnoid pial (leptomeningeal) pattern suggesting a degree of encephalitis.

202x235mm (300 x 300 DPI)

# The Natural History of Delirium in COVID-19 Intensive Care Unit patients: an Institutional Case Series

## **Background:**

The outbreak of CoV-2, the virus that causes COVID-19, emerged as a public health threat in December 2019 and declared a pandemic by World Health Organization in March 2020. Several case reports and studies have described the serious nature of complications associated with this disease. Neurological complications, affecting both the central and peripheral nervous systems, have also been reported. Central nervous system (CNS) complications have been particularly harrowing. Seizures, ataxia, and encephalopathy have all been observed with this disease (1,2).

Critically ill patients with COVID-19 have an accelerated risk of delirium due to multiple factors. This can be directly due to invasion of COVID to Central nervous system, or indirectly related to the severity of inflammatory response and induction of CNS inflammatory mediators (3,4). Other accelerating factors unique to patients who are admitted to ICU include effect of sedative strategies, prolonged mechanical ventilation, secondary effect of other organ failure, and social isolation and quarantine from family and care givers. In addition, delirium in the ICU worsen overall prognosis. If left unmitigated, delirium can exacerbate related complications such as ICU acquired weakness, dementia, depression, and PTSD (5,9).

In this context we propose to conduct a case series analysis to better characterize the natural history of delirium in COVID patients. The objective of this study is to better understand the natural history of delirium in in ICU COVID patients. We hypothesize that delirium is a common

1  
2  
3  
4  
5  
6  
7  
8  
9  
10  
11  
12  
13  
14  
15  
16  
17  
18  
19  
20  
21  
22  
23  
24  
25  
26  
27  
28  
29  
30  
31  
32  
33  
34  
35  
36  
37  
38  
39  
40  
41  
42  
43  
44  
45  
46  
47  
48  
49  
50  
51  
52  
53  
54  
55  
56  
57  
58  
59  
60

complication associated with COVID-19, and it is associated with substantial morbidity and mortality.

For peer review only

## **Methods:**

### *Study design and overview*

This is a single center, observational case series analysis to analyze the incidence of delirium in ICU patients with COVID-19 infection. Post-discharge screening surveys using psychometric screening tools will also be performed. All study operations will be conducted at Michigan Medicine, Ann Arbor MI USA. Institutional Review Board exemption will be sought from University of Michigan Medical School (IRBMED).

### *Eligibility criteria*

All adult patients (age 18 and older) with a COVID-19 diagnosis admitted to an ICU within Michigan Medicine between the dates of 03/01/2020 –05/31/2020 (N=154).

### *Data collection*

Analysis will be conducted via retrospective chart reviews of patients who were diagnosed with COVID-19 and who were admitted to a Michigan Medicine ICU between 03/01/2020 – 05/31/2020. The charts will be reviewed for delirium presence using validated chart review method (6). Review of the entire medical record, including progress notes, nursing notes, consult notes, will be conducted. Delirium will be coded as “yes” if any key terms or descriptors were present based on chart review methodology. Other extracted data will include:

- Presence of other organ failures
- Presence of Inflammatory markers including CRP, Ferritin and Interlukin-6
- Neuro-radiological findings



- Delirium prevention measures in ICU
- Approach to use of sedation medications and anticholinergic agents in ICU admission
- Use of antidepressants
- Psychiatry consult
- Length of hospital stay
- Disposition of patients to home, nursing or care facility.

Qualitative analysis will be conducted via prospective post discharge screening of COVID-19 patients who were admitted to Intensive care units or patients' families. A phone call will be placed within 30-60 days post discharge, and a one-time phone interview will be conducted to probe cognitive function abilities of all surviving patients and their family members (see Exploratory Outcomes below).

## *Outcomes*

### **Primary Outcome**

Delirium presence (yes/no) at any point during ICU stay. Delirium incidence will then be the formal outcome.

### **Secondary Outcomes**

- Number of delirium days (n)
- Intensive care unit length of stay (days)
- Hospital length of stay (days)
- Ventilator (or ventilator free days)

- 1
- 2
- 3 • Laboratory values:
- 4
  - 5 ○ WBC
  - 6
  - 7 ○ Inflammatory markers
  - 8
    - 9 ▪ CRP
    - 10
    - 11 ▪ Ferritin
    - 12
    - 13 ▪ IL-6
    - 14
  - 15
- 16 • Neuroradiologic findings
- 17
  - 18 ○ Stroke (via MRI)
  - 19
  - 20 ○ Perfusion abnormalities (via MRI)
  - 21
  - 22 ○ White matter hyperintensities (MRI)
  - 23
  - 24 ○ Leptomeningeal enhancement
  - 25
- 26 • Psychiatry consults, n (%)
- 27
- 28 • Antipsychotic use
- 29
- 30 • Antidepressant use
- 31
- 32
- 33 • Delayed discharge (%) due to cognitive impairment
- 34
- 35 • Disposition (to home or Long-term acute care facility)
- 36
- 37

### 38 Exploratory Outcomes

- 39
- 40 • Post-discharge PROMIS cognitive function score (via phone; Cognitive Function Abilities 4a)
- 41
- 42 • Post-discharge Blessed Test score (via phone)
- 43
- 44 • PHQ-9 – depression screen
- 45
- 46
- 47 • Post-discharge FAM CAM results (via phone) when families are available
- 48
- 49
- 50
- 51
- 52
- 53
- 54
- 55
- 56
- 57
- 58
- 59
- 60

### *Statistical Analysis*

Descriptive statistics will be reported for all outcomes. Exploratory data analysis techniques, such as histograms, QQ-Plots, box-plots, scatterplots and basic descriptive (means, medians, IQR) will be used to assess the distribution of dependent measures.

For peer review only

## **Discussion**

Delirium has been consistently identified as an independent risk factor for mortality and substantial morbidity in critically ill patients. Data regarding delirium in the COVID-19 patients are very limited. Critically ill patients who are infected with SARS-CoV-2 appear to have high risk of cognitive dysfunction. This can be as a result of direct invasion of CNS or indirect mechanisms due to other organ failure.

ICU delirium prevention bundles consistently reduce risk when implemented (7,8). However, unique challenges related to COVID-19 (e.g., propofol avoidance, social distancing, prolonged ventilation) have hindered standard prevention bundle implementation. As a result, COVID-19 ICU patients may have particularly high risk for delirium and related encephalopathies. The quantitative aspects of this study will provide an estimate of delirium incidence in COVID ICU patients, and the qualitative aspects may help elicit the impact of COVID-19 on the quality of survival after hospital discharge.

### *Strengths*

This study will help to determine the natural history of delirium in hospitalized critically ill patients with COVID-19.

### *Limitations*

This is a single center analysis; the results will be restricted to the institution studied. This is also retrospective chart review with limited – and descriptive – reporting.

1  
2  
3 Quantitative results will only reflect descriptive reporting. The reason as to why ICU team may  
4  
5 or may not have followed certain treatment or sedation protocols will not be available. In terms  
6  
7 of the qualitative arm of the study, results are predicated upon successfully obtaining phone  
8  
9 survey data from patients and families. These data maybe limited given patient and family  
10  
11 availability.  
12  
13  
14  
15  
16  
17  
18  
19  
20  
21  
22  
23  
24  
25  
26  
27  
28  
29  
30  
31  
32  
33  
34  
35  
36  
37  
38  
39  
40  
41  
42  
43  
44  
45  
46  
47  
48  
49  
50  
51  
52  
53  
54  
55  
56  
57  
58  
59  
60

## References:

1. Lau KK, Yu WC, Chu CM, Lau ST, Sheng B, Yuen KY. Possible central nervous system infection by SARS coronavirus. *Emerg Infect Dis.* 2004;10(2):342–4
2. Xu J, Zhong S, Liu J, Li L, Li Y, Wu X, Li Z, Deng P, Zhang J, Zhong N, et al. Detection of severe acute respiratory syndrome coronavirus in the brain: potential role of the chemokine mig in pathogenesis. *Clin Infect Dis.* 2005; 41(8):1089–96.
3. Bergmann CC, Lane TE, Stohlman SA. Coronavirus infection of the central nervous system: host–virus stand-off. *Nat Rev Microbiol.* 2006;4(2):121–32.
4. Pilli D, Zou A, Tea F, Dale RC, Brilot F. Expanding role of T cells in human autoimmune diseases of the central nervous system. *Front Immunol.* 2017;8: 652
5. Kotfis, K., Williams Roberson, S., Wilson, J.E. *et al.* COVID-19: ICU delirium management during SARS-CoV-2 pandemic. *Crit Care* **24**, 176 (2020).  
<https://doi.org/10.1186/s13054-020-02882-x>
6. Inouye, S. K., Leo-Summers, L., Zhang, Y., Bogardus, S. T., Leslie, D. L., & Agostini, J. V. (2005). A chart-based method for identification of delirium: Validation compared with interviewer ratings using the confusion assessment method. *Journal of the American Geriatrics Society*, 53(2), 312-318. <https://doi.org/10.1111/j.1532-5415.2005.53120.x>
7. Ely EW. The ABCDEF bundle: science and philosophy of how ICU liberation serves patients and families. *Crit Care Med.* 2017;45(2):321–30
8. Barnes-Daly MA, Phillips G, Ely EW. Improving hospital survival and reducing brain dysfunction at seven California community hospitals: implementing PAD guidelines via the ABCDEF bundle in 6,064 patients. *Crit Care Med.* 2017;45(2):171–8

- 1  
2  
3 9. Mao L, Jin H, Wang M, et al. Neurologic Manifestations of Hospitalized Patients With  
4  
5 Coronavirus Disease 2019 in Wuhan, China. *JAMA Neurol*. Published online April 10,  
6  
7 2020. doi:10.1001/jamaneurol.2020.1127  
8  
9  
10  
11  
12  
13  
14  
15  
16  
17  
18  
19  
20  
21  
22  
23  
24  
25  
26  
27  
28  
29  
30  
31  
32  
33  
34  
35  
36  
37  
38  
39  
40  
41  
42  
43  
44  
45  
46  
47  
48  
49  
50  
51  
52  
53  
54  
55  
56  
57  
58  
59  
60

## CARE Checklist of information to include when writing a case report

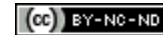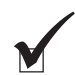

| Topic                           | Item       | Checklist item description                                                                                       | Reported on Line |
|---------------------------------|------------|------------------------------------------------------------------------------------------------------------------|------------------|
| <b>Title</b>                    | <b>1</b>   | The diagnosis or intervention of primary focus followed by the words "case report" . . . . .                     | _____            |
| <b>Key Words</b>                | <b>2</b>   | 2 to 5 key words that identify diagnoses or interventions in this case report, including "case report" . . . . . | _____            |
| <b>Abstract (no references)</b> | <b>3a</b>  | Introduction: What is unique about this case and what does it add to the scientific literature? . . . . .        | _____            |
|                                 | <b>3b</b>  | Main symptoms and/or important clinical findings . . . . .                                                       | _____            |
|                                 | <b>3c</b>  | The main diagnoses, therapeutic interventions, and outcomes . . . . .                                            | _____            |
|                                 | <b>3d</b>  | Conclusion—What is the main "take-away" lesson(s) from this case? . . . . .                                      | _____            |
| <b>Introduction</b>             | <b>4</b>   | One or two paragraphs summarizing why this case is unique ( <b>may include references</b> ) . . . . .            | _____            |
| <b>Patient Information</b>      | <b>5a</b>  | De-identified patient specific information. . . . .                                                              | _____            |
|                                 | <b>5b</b>  | Primary concerns and symptoms of the patient. . . . .                                                            | _____            |
|                                 | <b>5c</b>  | Medical, family, and psycho-social history including relevant genetic information . . . . .                      | _____            |
|                                 | <b>5d</b>  | Relevant past interventions with outcomes . . . . .                                                              | _____            |
| <b>Clinical Findings</b>        | <b>6</b>   | Describe significant physical examination (PE) and important clinical findings. . . . .                          | _____            |
| <b>Timeline</b>                 | <b>7</b>   | Historical and current information from this episode of care organized as a timeline . . . . .                   | _____            |
| <b>Diagnostic Assessment</b>    | <b>8a</b>  | Diagnostic testing (such as PE, laboratory testing, imaging, surveys). . . . .                                   | _____            |
|                                 | <b>8b</b>  | Diagnostic challenges (such as access to testing, financial, or cultural) . . . . .                              | _____            |
|                                 | <b>8c</b>  | Diagnosis (including other diagnoses considered) . . . . .                                                       | _____            |
|                                 | <b>8d</b>  | Prognosis (such as staging in oncology) where applicable . . . . .                                               | _____            |
| <b>Therapeutic Intervention</b> | <b>9a</b>  | Types of therapeutic intervention (such as pharmacologic, surgical, preventive, self-care) . . . . .             | _____            |
|                                 | <b>9b</b>  | Administration of therapeutic intervention (such as dosage, strength, duration) . . . . .                        | _____            |
|                                 | <b>9c</b>  | Changes in therapeutic intervention (with rationale) . . . . .                                                   | _____            |
| <b>Follow-up and Outcomes</b>   | <b>10a</b> | Clinician and patient-assessed outcomes (if available) . . . . .                                                 | _____            |
|                                 | <b>10b</b> | Important follow-up diagnostic and other test results . . . . .                                                  | _____            |
|                                 | <b>10c</b> | Intervention adherence and tolerability (How was this assessed?) . . . . .                                       | _____            |
|                                 | <b>10d</b> | Adverse and unanticipated events . . . . .                                                                       | _____            |
| <b>Discussion</b>               | <b>11a</b> | A scientific discussion of the strengths AND limitations associated with this case report . . . . .              | _____            |
|                                 | <b>11b</b> | Discussion of the relevant medical literature <b>with references</b> . . . . .                                   | _____            |
|                                 | <b>11c</b> | The scientific rationale for any conclusions (including assessment of possible causes) . . . . .                 | _____            |
|                                 | <b>11d</b> | The primary "take-away" lessons of this case report (without references) in a one paragraph conclusion . . . . . | _____            |
| <b>Patient Perspective</b>      | <b>12</b>  | The patient should share their perspective in one to two paragraphs on the treatment(s) they received . . . . .  | _____            |
| <b>Informed Consent</b>         | <b>13</b>  | Did the patient give informed consent? Please provide if requested . . . . .                                     | _____            |



## Supplemental Figure 1

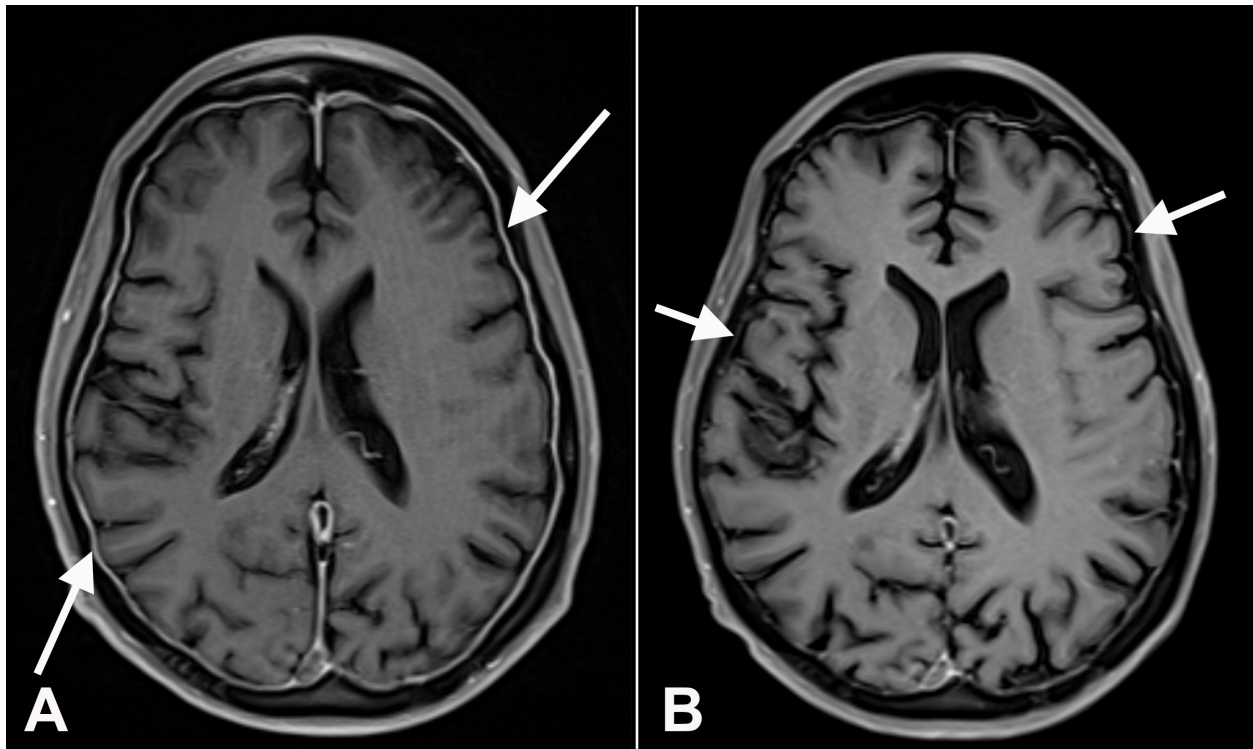

A, Axial T1 post-contrast with fat suppression images at the level of the mid lateral ventricles demonstrate smooth dural enhancement (arrows) along the bilateral cerebral convexities. B, This feature resolves one month later (arrows). The overall pattern of dura-arachnoid/pachymeningeal enhancement is non-specific, can be seen with intracranial hypotension, in the procedural setting (e.g., lumbar puncture), and other scenarios (e.g., infection, inflammation).

## Supplemental Figure 2

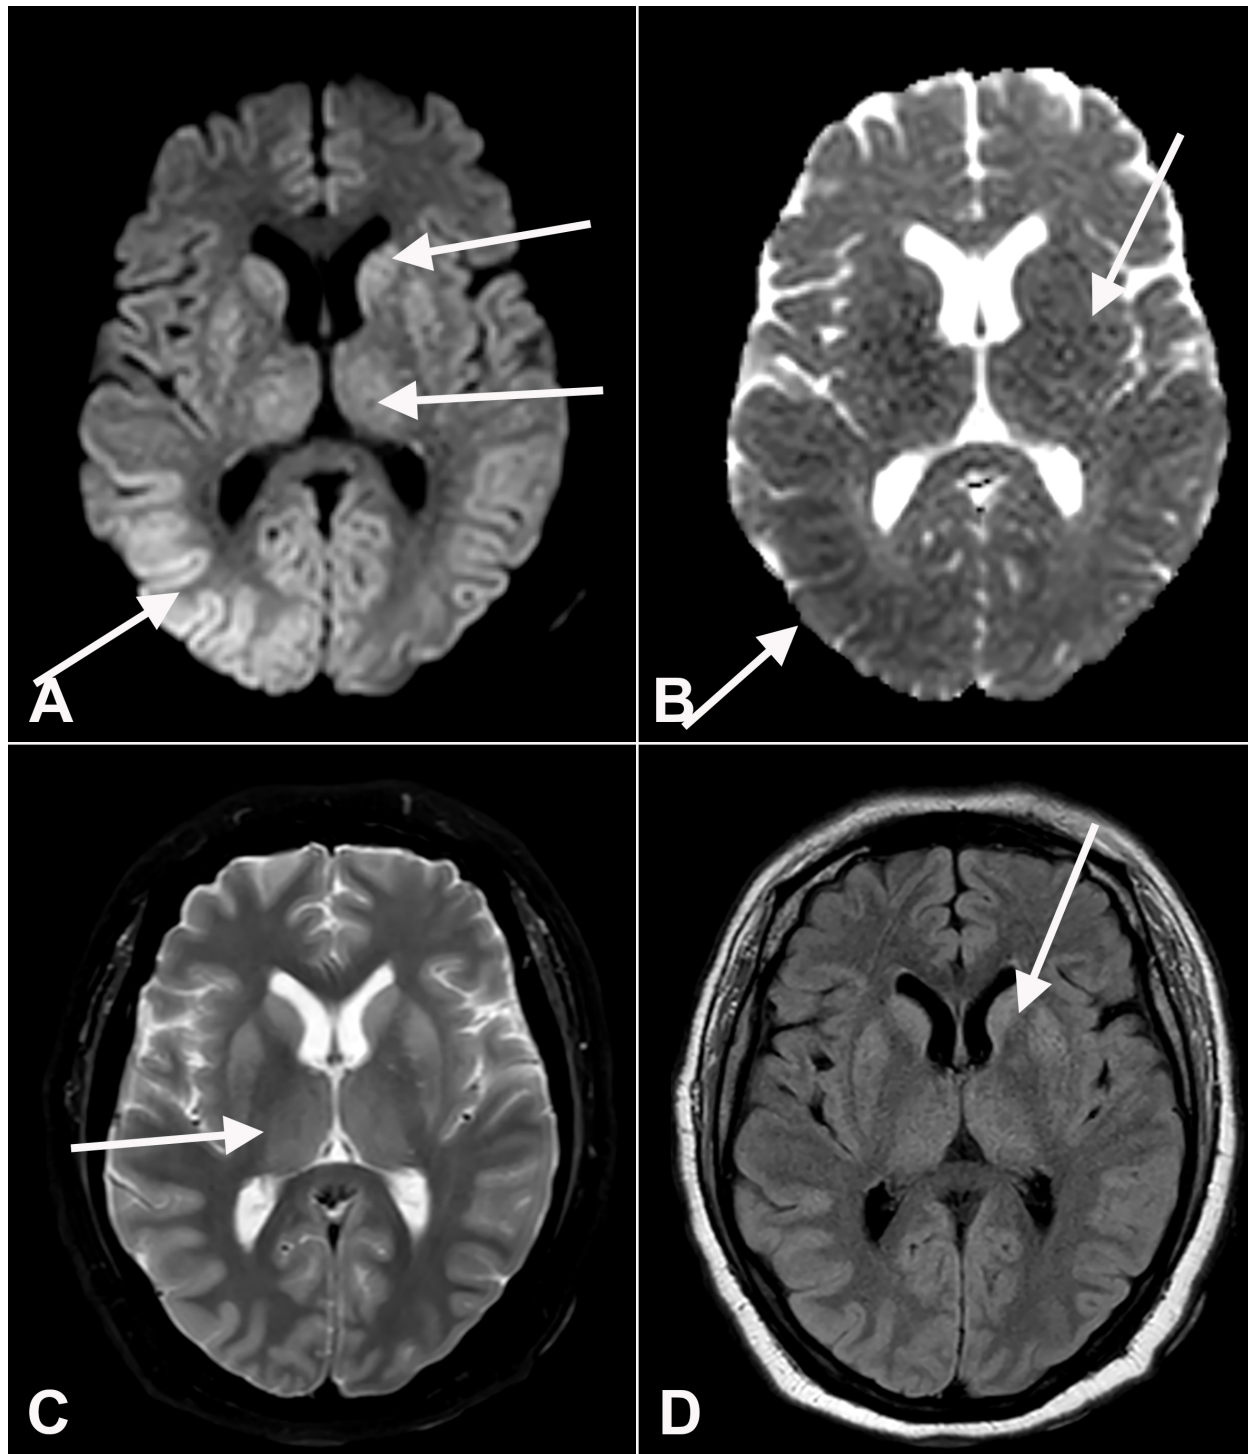

After initial non-contrast head CT (which was unremarkable), the patient had diffuse parenchymal abnormalities on MRI examination. A, Axial diffusion-weighted imaging shows hyperintense signal (arrows) at the bilateral basal ganglia, thalami, and posterior cortices, regions are hypointense (arrows) on corresponding apparent diffusion coefficient map (B). These same locations are hyperintense on T2 (C) and FLAIR (D), especially at the basal ganglia and thalami.

**Supplemental Figure 3**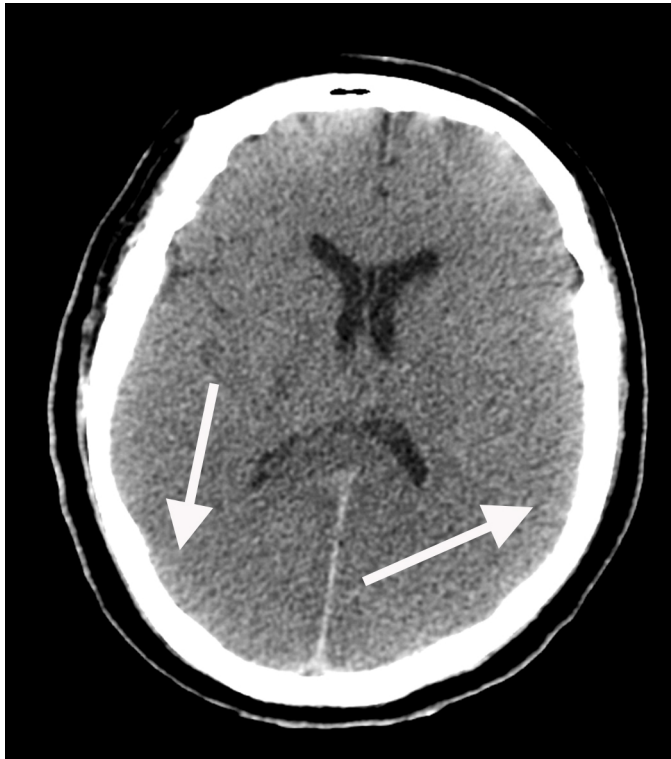

Non-contrast head CT performed approximately two weeks after cardiopulmonary arrest shows poor sulcation (arrows) bilaterally, suggesting global insult, most likely hypoxic-ischemic in etiology

## CARE Checklist of information to include when writing a case report



| Topic                           | Item       | Checklist item description                                                                                       | Reported on Line |
|---------------------------------|------------|------------------------------------------------------------------------------------------------------------------|------------------|
| <b>Title</b>                    | <b>1</b>   | The diagnosis or intervention of primary focus followed by the words "case report" . . . . .                     | _____            |
| <b>Key Words</b>                | <b>2</b>   | 2 to 5 key words that identify diagnoses or interventions in this case report, including "case report" . . .     | _____            |
| <b>Abstract (no references)</b> | <b>3a</b>  | Introduction: What is unique about this case and what does it add to the scientific literature? . . . . .        | _____            |
|                                 | <b>3b</b>  | Main symptoms and/or important clinical findings . . . . .                                                       | _____            |
|                                 | <b>3c</b>  | The main diagnoses, therapeutic interventions, and outcomes . . . . .                                            | _____            |
|                                 | <b>3d</b>  | Conclusion—What is the main "take-away" lesson(s) from this case? . . . . .                                      | _____            |
| <b>Introduction</b>             | <b>4</b>   | One or two paragraphs summarizing why this case is unique ( <b>may include references</b> ) . . . . .            | _____            |
| <b>Patient Information</b>      | <b>5a</b>  | De-identified patient specific information. . . . .                                                              | _____            |
|                                 | <b>5b</b>  | Primary concerns and symptoms of the patient. . . . .                                                            | _____            |
|                                 | <b>5c</b>  | Medical, family, and psycho-social history including relevant genetic information . . . . .                      | _____            |
|                                 | <b>5d</b>  | Relevant past interventions with outcomes . . . . .                                                              | _____            |
| <b>Clinical Findings</b>        | <b>6</b>   | Describe significant physical examination (PE) and important clinical findings. . . . .                          | _____            |
| <b>Timeline</b>                 | <b>7</b>   | Historical and current information from this episode of care organized as a timeline . . . . .                   | _____            |
| <b>Diagnostic Assessment</b>    | <b>8a</b>  | Diagnostic testing (such as PE, laboratory testing, imaging, surveys). . . . .                                   | _____            |
|                                 | <b>8b</b>  | Diagnostic challenges (such as access to testing, financial, or cultural) . . . . .                              | _____            |
|                                 | <b>8c</b>  | Diagnosis (including other diagnoses considered) . . . . .                                                       | _____            |
|                                 | <b>8d</b>  | Prognosis (such as staging in oncology) where applicable . . . . .                                               | _____            |
| <b>Therapeutic Intervention</b> | <b>9a</b>  | Types of therapeutic intervention (such as pharmacologic, surgical, preventive, self-care) . . . . .             | _____            |
|                                 | <b>9b</b>  | Administration of therapeutic intervention (such as dosage, strength, duration) . . . . .                        | _____            |
|                                 | <b>9c</b>  | Changes in therapeutic intervention (with rationale) . . . . .                                                   | _____            |
| <b>Follow-up and Outcomes</b>   | <b>10a</b> | Clinician and patient-assessed outcomes (if available) . . . . .                                                 | _____            |
|                                 | <b>10b</b> | Important follow-up diagnostic and other test results . . . . .                                                  | _____            |
|                                 | <b>10c</b> | Intervention adherence and tolerability (How was this assessed?) . . . . .                                       | _____            |
|                                 | <b>10d</b> | Adverse and unanticipated events . . . . .                                                                       | _____            |
| <b>Discussion</b>               | <b>11a</b> | A scientific discussion of the strengths AND limitations associated with this case report . . . . .              | _____            |
|                                 | <b>11b</b> | Discussion of the relevant medical literature <b>with references</b> . . . . .                                   | _____            |
|                                 | <b>11c</b> | The scientific rationale for any conclusions (including assessment of possible causes) . . . . .                 | _____            |
|                                 | <b>11d</b> | The primary "take-away" lessons of this case report (without references) in a one paragraph conclusion . . . . . | _____            |
| <b>Patient Perspective</b>      | <b>12</b>  | The patient should share their perspective in one to two paragraphs on the treatment(s) they received . . . . .  | _____            |
| <b>Informed Consent</b>         | <b>13</b>  | Did the patient give informed consent? Please provide if requested . . . . .                                     | _____            |

# BMJ Open

## Delirium and Neuropsychological Outcomes in Critically Ill Patients with COVID-19: a Cohort Study

|                                 |                                                                                                                                                                                                                                                                                                                                                                                                                                                                                                                                                                                                                         |
|---------------------------------|-------------------------------------------------------------------------------------------------------------------------------------------------------------------------------------------------------------------------------------------------------------------------------------------------------------------------------------------------------------------------------------------------------------------------------------------------------------------------------------------------------------------------------------------------------------------------------------------------------------------------|
| Journal:                        | <i>BMJ Open</i>                                                                                                                                                                                                                                                                                                                                                                                                                                                                                                                                                                                                         |
| Manuscript ID                   | bmjopen-2021-050045.R1                                                                                                                                                                                                                                                                                                                                                                                                                                                                                                                                                                                                  |
| Article Type:                   | Original research                                                                                                                                                                                                                                                                                                                                                                                                                                                                                                                                                                                                       |
| Date Submitted by the Author:   | 19-Jul-2021                                                                                                                                                                                                                                                                                                                                                                                                                                                                                                                                                                                                             |
| Complete List of Authors:       | Ragheb, Jacqueline; Michigan Medicine, Anesthesiology<br>McKinney, Amy; Michigan Medicine, Anesthesiology<br>Zierau, Mackenzie; Michigan Medicine, Anesthesiology<br>Brooks, Joseph; Michigan Medicine, Anesthesiology<br>Hill-Caruthers, Maria; Michigan Medicine, Anesthesiology<br>Iskander, Mina; New York Medical College<br>Ahmed, Yusuf; Michigan Medicine, Anesthesiology<br>Lobo, Remy; Michigan Medicine, Radiology<br>Mentz, Graciela; Michigan Medicine, Anesthesiology<br>Vlisides, Phillip E.; Michigan Medicine, Anesthesiology; University of Michigan Medical School, Center for Consciousness Science |
| <b>Primary Subject Heading</b>: | Intensive care                                                                                                                                                                                                                                                                                                                                                                                                                                                                                                                                                                                                          |
| Secondary Subject Heading:      | Anaesthesia, Infectious diseases, Neurology, Public health, Radiology and imaging                                                                                                                                                                                                                                                                                                                                                                                                                                                                                                                                       |
| Keywords:                       | Delirium & cognitive disorders < PSYCHIATRY, COVID-19, Adult intensive & critical care < ANAESTHETICS, Neurological injury < NEUROLOGY                                                                                                                                                                                                                                                                                                                                                                                                                                                                                  |
|                                 |                                                                                                                                                                                                                                                                                                                                                                                                                                                                                                                                                                                                                         |

SCHOLARONE™  
Manuscripts



I, the Submitting Author has the right to grant and does grant on behalf of all authors of the Work (as defined in the below author licence), an exclusive licence and/or a non-exclusive licence for contributions from authors who are: i) UK Crown employees; ii) where BMJ has agreed a CC-BY licence shall apply, and/or iii) in accordance with the terms applicable for US Federal Government officers or employees acting as part of their official duties; on a worldwide, perpetual, irrevocable, royalty-free basis to BMJ Publishing Group Ltd ("BMJ") its licensees and where the relevant Journal is co-owned by BMJ to the co-owners of the Journal, to publish the Work in this journal and any other BMJ products and to exploit all rights, as set out in our [licence](#).

The Submitting Author accepts and understands that any supply made under these terms is made by BMJ to the Submitting Author unless you are acting as an employee on behalf of your employer or a postgraduate student of an affiliated institution which is paying any applicable article publishing charge ("APC") for Open Access articles. Where the Submitting Author wishes to make the Work available on an Open Access basis (and intends to pay the relevant APC), the terms of reuse of such Open Access shall be governed by a Creative Commons licence – details of these licences and which [Creative Commons](#) licence will apply to this Work are set out in our licence referred to above.

Other than as permitted in any relevant BMJ Author's Self Archiving Policies, I confirm this Work has not been accepted for publication elsewhere, is not being considered for publication elsewhere and does not duplicate material already published. I confirm all authors consent to publication of this Work and authorise the granting of this licence.

1  
2  
3 **Delirium and Neuropsychological Outcomes in Critically Ill Patients with COVID-**  
4  
5 **19: a Cohort Study**  
6  
7  
8  
9

10 Jacqueline Ragheb, MD<sup>1</sup>;† Amy McKinney, MA<sup>1</sup>;† Mackenzie Zierau, BSN<sup>1</sup>; Joseph  
11 Brooks, BS<sup>1</sup>; Maria Hill-Caruthers<sup>1</sup>; Mina Iskander MS<sup>2</sup>; Yusuf Ahmed, BS<sup>1</sup>; Remy Lobo,  
12 MD<sup>3</sup>; Graciela Mentz, PhD<sup>1</sup>; and Phillip E. Vlisides, MD<sup>1,4\*</sup>  
13  
14  
15  
16  
17  
18

19 <sup>1</sup>Department of Anesthesiology, Michigan Medicine, Ann Arbor, MI USA  
20

21 <sup>2</sup>New York Medical College, Valhalla, NY USA  
22

23 <sup>3</sup>Department of Radiology, Michigan Medicine, Ann Arbor, MI USA  
24

25 <sup>4</sup>Center for Consciousness Science, University of Michigan Medical School, Ann Arbor,  
26 MI USA  
27  
28  
29

30  
31  
32  
33 †These authors contributed equally to the manuscript  
34  
35  
36  
37

38 Funding statement: This research received no specific grant from any funding agency in  
39 the public, commercial, or not-for-profit sectors.  
40  
41  
42  
43

44  
45 Competing interests: None declared.  
46  
47  
48  
49

50 \*Correspondence:  
51

52 Dr Phillip E. Vlisides  
53

54 Department of Anesthesiology  
55  
56  
57  
58  
59  
60

1  
2  
3  
4  
5  
6  
7  
8  
9  
10  
11  
12  
13  
14  
15  
16  
17  
18  
19  
20  
21  
22  
23  
24  
25  
26  
27  
28  
29  
30  
31  
32  
33  
34  
35  
36  
37  
38  
39  
40  
41  
42  
43  
44  
45  
46  
47  
48  
49  
50  
51  
52  
53  
54  
55  
56  
57  
58  
59  
60

University of Michigan Medical School, 1H247 UH, SPC-5048  
1500 East Medical Center Drive  
Ann Arbor, MI 48109-5048.  
pvliside@med.umich.edu  
Phone: 734-936-4280.

For peer review only



## Abstract

**Objective:** To characterise the clinical course of delirium for patients with Coronavirus Disease 2019 (COVID-19) in the intensive care unit, including post-discharge neuropsychological outcomes.

**Design:** Retrospective chart review and prospective survey study.

**Setting:** Intensive care units, large academic tertiary-care centre (USA).

**Participants:** Patients (n=148) with COVID-19 admitted to an intensive care unit at Michigan Medicine between 1 March 2020 and 31 May 2020 were eligible for inclusion.

**Primary and secondary outcome measures:** Delirium was the primary outcome, assessed via validated chart review method. Secondary outcomes included measures related to delirium, such as delirium duration, antipsychotic use, length of hospital and intensive care unit stay, inflammatory markers, and final disposition. Neuroimaging data were also collected. Lastly, a telephone survey was conducted between 1-2 months after discharge to determine neuropsychological function via the following tests: Family Confusion Assessment Method, Short Blessed Test, Patient-Reported Outcomes Measurement Information System Cognitive Abilities 4a, and Patient-Health Questionnaire-9.

1  
2  
3 **Results:** Delirium was identified in 108/148 (73%) patients, with median (interquartile  
4 range) duration lasting 10 (4 – 17) days. In the delirium cohort, 50% (54/108) of patients  
5 were African American, and delirious patients were more likely to be female (76/108,  
6 70%) (absolute standardized differences >.30). Sedation regimens, inflammation,  
7 delirium prevention protocol deviations, and hypoxic-ischemic injury were likely  
8 contributing factors, and the most common disposition for delirious patients was a  
9 skilled care facility (41/108, 38%). Among patients who were delirious during  
10 hospitalization, 4/17 (24%) later screened positive for delirium at home based on  
11 caretaker assessment, 5/22 (23%) demonstrated signs of questionable cognitive  
12 impairment or cognitive impairment consistent with dementia, and 3/25 (12%) screened  
13 positive for depression within two months after discharge.  
14  
15  
16  
17  
18  
19  
20  
21  
22  
23  
24  
25  
26  
27  
28  
29  
30

31 **Conclusion:** Patients with COVID-19 commonly experience a prolonged course of  
32 delirium in the intensive care unit, likely with multiple contributing factors. Furthermore,  
33 neuropsychological impairment may persist after discharge.  
34  
35  
36  
37  
38  
39  
40  
41  
42  
43  
44  
45  
46  
47  
48  
49  
50  
51  
52  
53  
54  
55  
56  
57  
58  
59  
60

### Strengths and limitations of this study

- The validated chart review method increases confidence in the delirium findings reported.
- Granular details included (i.e., inflammatory profiles, neuroimaging findings, post-discharge neuropsychological function) provide a comprehensive assessment of delirium phenotype in this patient population along with related complications.
- As a single-centre study, findings are restricted to the institution included.
- Many patients were lost to follow-up after hospital discharge.

## Introduction

The outbreak of Severe Acute Respiratory Syndrome Coronavirus 2 (SARS-CoV-2), the virus that causes Coronavirus Disease (COVID-19), emerged as a public health threat in December 2019 and was declared a pandemic by World Health Organization in March 2020. Major neurological complications, such as encephalopathy, strokes, seizures, and ataxia, have all been observed.<sup>1-5</sup> Delirium appears to be a common complication, with previous investigations demonstrating an incidence of approximately 65-80% in the intensive care unit (ICU).<sup>1,4</sup> Delirium may occur due to direct coronavirus invasion of the central nervous system,<sup>6</sup> and systemic inflammatory responses may further exacerbate neurocognitive impairment. In the ICU, multiple delirium risk factors are often present and can increase risk in an additive manner.<sup>7</sup> Delirium is also associated with prolonged hospitalization, long-term cognitive and functional impairment, and increased mortality.<sup>8-10</sup> As such, there is a critical need to improve understanding of this syndrome in patients with COVID-19.

While a high incidence of delirium has been reported in COVID-19 patients, fundamental questions persist. The clinical course of delirium, including average duration and post-discharge cognitive trajectory, remains incompletely understood. Pathophysiologic drivers of delirium require advanced understanding, and the extent to which standard prevention protocols are implemented is unclear. Such detailed understanding will contribute to delirium phenotyping of COVID-19 patients and provide insight into the clinical and neurocognitive burden associated with COVID-19. In this context, the objective of this study was to determine granular details associated with

1  
2  
3 delirium in ICU patients with COVID-19. Specifically, the clinical course of delirium,  
4  
5 presence of exacerbating factors, nature of prevention strategy implementation, and  
6  
7 post-discharge cognitive outcomes were all characterized.  
8  
9  
10  
11  
12  
13  
14  
15  
16  
17  
18  
19  
20  
21  
22  
23  
24  
25  
26  
27  
28  
29  
30  
31  
32  
33  
34  
35  
36  
37  
38  
39  
40  
41  
42  
43  
44  
45  
46  
47  
48  
49  
50  
51  
52  
53  
54  
55  
56  
57  
58  
59  
60

For peer review only

## Methods

### *Study design and overview*

This was a single-centre cohort study from Michigan Medicine. Detailed chart review data were collected from critically ill patients with COVID-19 (3/1/2020 – 5/31/2020), and post-discharge telephone surveys were conducted to test neuropsychological function after discharge. All study operations were conducted at Michigan Medicine, Ann Arbor MI USA, and approval was obtained from the University of Michigan Medical School Institutional Review Board (HUM00182646). A Health Insurance Portability and Accountability Act waiver was granted to retrospectively review patient medical records, and informed consent was not required for retrospective chart review. Patients who agreed to complete telephone surveys after discharge were consented over the telephone prior to survey administration using a comprehensive consent document. A waiver of documentation of consent was approved in conjunction with Institutional Review Board approval and as required by U.S. Department of Health and Human Services regulations and policy. Lastly, the Strengthening the Reporting of Observational Studies in Epidemiology (STROBE) checklist is included in the supplemental online material (Supplemental Table 1). These guidelines provide reporting standards for observational studies.<sup>11</sup>

### *Eligibility criteria*

All patients with a COVID-19 diagnosis admitted to a Michigan Medicine ICU between 03/01/2020 – 05/31/2020 were eligible for study inclusion. ICU patients admitted during this time, without a diagnosis of COVID-19, were not eligible for study inclusion.

## Outcomes

The primary outcome was delirium presence (yes/no, %) at any point during admission (see “Data collection” section for delirium assessment details). Several secondary outcomes were also collected in relation to delirium and overall clinical trajectory. These outcomes included the following: duration of delirium (days), antipsychotic administration (which may serve as a surrogate marker for hyperactive delirium and/or agitation), length of hospital stay, length of ICU stay, number of days requiring ventilator support, haemodialysis (given the association between renal injury and delirium),<sup>12</sup> inflammatory laboratory values that have been implicated with COVID-19 and cognitive dysfunction (white blood cell count, c-reactive protein, ferritin, lactate dehydrogenase, d-dimer, and interleukin-6),<sup>2 4 5</sup> new psychiatry consults, new antidepressant use (given the possibility of major depressive disorder with critical illness),<sup>13</sup> and final disposition (e.g., home, long-term care facility, death). Delirium prevention strategies, based on the ABCDEF ICU liberation bundle,<sup>14 15</sup> were also recorded. These included the following: structured mobility exercises, placing familiar objects from home at the bedside, promoting use of visual and hearing aids, and spontaneous awakening/breathing trials. The total number of times a prevention strategy was charted was recorded for each patient, and this number was divided by the *expected* number of times that intervention should have occurred based on length of ICU stay and protocolised schedule. This provided the estimated compliance rate for each intervention. Neuroimaging data were also collected and reviewed. There was no neuroimaging protocol in place for patients

1  
2  
3 with COVID-19. Rather, neuroimaging was ordered at the discretion of clinical care  
4 teams as indicated.  
5  
6  
7  
8  
9

10 Lastly, a telephone survey was conducted after hospital discharge to determine whether  
11 subjective or objective signs of cognitive impairment were present. The initial phone call  
12 was placed between 30-60 days post-discharge. Twenty patients did not return phone  
13 calls until after 60 days, and the average length of time between discharge and survey  
14 administration was 83 days. Telephone surveys were conducted by a member of the  
15 research team (A.M.) with formal training in the Confusion Assessment Method for  
16 delirium.<sup>16</sup> Phone calls were placed between the hours of 9:00 AM and 4:00 PM,  
17 Monday through Saturday, and a total of three telephone contact attempts were made  
18 before considering loss to follow-up. Voicemail messages were left after each phone  
19 call. During telephone interviews, the following tests were conducted: the Patient-  
20 Reported Outcomes Measurement Information System (PROMIS)<sup>17</sup> Cognitive Function  
21 Abilities 4a, Short Blessed Test (score 0-4 = normal cognition, score 5-9 = questionable  
22 impairment, score  $\geq 10$  = impairment consistent with dementia),<sup>18</sup> Family Confusion  
23 Assessment Method (FAM-CAM) for delirium,<sup>19</sup> and the Patient Health Questionnaire-9  
24 (scores  $\geq 10$  were considered positive screens for depression).<sup>20 21</sup>  
25  
26  
27  
28  
29  
30  
31  
32  
33  
34  
35  
36  
37  
38  
39  
40  
41  
42  
43  
44  
45  
46

#### 47 *Data collection*

48  
49 Screening for eligible patients was first performed for via DataDirect, a software tool  
50 from the University of Michigan Office of Research that enables research teams to  
51  
52  
53  
54  
55  
56  
57  
58  
59  
60



1  
2  
3 retrospectively search for patient cohorts. Charts that screened positive were then  
4  
5 manually reviewed by study team members to confirm study eligibility.  
6  
7  
8  
9

10 Charts were then reviewed in further detail for outcome abstraction. Delirium was  
11 defined by the presence of either of the following criteria: (1) a positive Confusion  
12 Assessment Method screen,<sup>22</sup> as conducted by the bedside nurse, or (2) the presence  
13  
14 of an acute confusional state, as documented in the medical record and elucidated via  
15 validated, standardized, chart review method.<sup>23</sup> In terms of Confusion Assessment  
16  
17 Method screening, this is conducted every 12 hours by the bedside intensive care unit  
18  
19 nurse per hospital protocol. Nurses at our institution receive formal training in the  
20  
21 Confusion Assessment Method for delirium during their clinical training. For the chart  
22  
23 review method, members of the research team reviewed patient charts with the aim of  
24  
25 identifying any instance of an acute confusional state, which would count as an episode  
26  
27 of delirium. The methodology for defining an acute confusion state is also drawn from  
28  
29 the Confusion Assessment Method,<sup>22</sup> which assesses for acute changes in cognition,  
30  
31 fluctuating course, inattention, altered levels of consciousness, and disorganized  
32  
33 thinking. This was the core set of delirium symptoms in this cohort, and hyperactive  
34  
35 states (e.g., agitation) were reported as well. If these symptoms were present for a  
36  
37 given patient, the patient was considered as having delirium, and the source of  
38  
39 information was recorded along with the date and time. The total number of days with  
40  
41 acute confusion was also included in the instrument, along with any evidence of  
42  
43 reversibility or improvement of the confusion state. Thus, overall, a case of delirium was  
44  
45 counted either for (1) a positive Confusion Assessment Method screen or (2) an acute  
46  
47  
48  
49  
50  
51  
52  
53  
54  
55  
56  
57  
58  
59  
60

1  
2  
3 confusional state documented in the medical record as abstracted by the chart review  
4 method described. Other clinical outcomes, along with laboratory values, were collected  
5 directly from the charts. Neuroimaging studies were manually reviewed by a board-  
6 certified radiologist with a Certificate of Added Qualification in neuroradiology (R.L.).  
7  
8  
9  
10  
11  
12  
13

### 14 *Patient and Public Involvement*

15 Neither patients nor the public were involved in this research.  
16  
17  
18  
19  
20

### 21 *Statistical Analysis*

22 Analyses were performed using IBM SPSS version 27 (Armonk, NY USA) and SAS  
23 version 9.4 (SAS Institute, Cary, NC USA). Exploratory data analysis techniques were  
24 used to assess the distribution of dependent measures for determining the appropriate  
25 analytical strategy. The Shapiro-Wilk test was used to assess the distribution of  
26 continuous outcomes, and Independent t-tests or Mann-Whitney U tests were used as  
27 appropriate. Mean (standard deviation) or median (interquartile range) was reported for  
28 parametric and non-parametric data, respectively. For binary outcomes and proportions,  
29 The Chi-Square Test or Fisher's Exact Test were used, as appropriate. Absolute  
30 standardized differences were calculated for determining differences in baseline  
31 characteristics between groups, with differences  $>.20$  considered to be imbalanced. The  
32 threshold for significance was set to  $p<0.05$  across all tests otherwise. For post-  
33 discharge cognitive outcomes, descriptive statistics were reported with no missing data  
34 plan for loss to follow-up. As a descriptive study, with chart data available for all  
35 patients, there was no missing data analysis.  
36  
37  
38  
39  
40  
41  
42  
43  
44  
45  
46  
47  
48  
49  
50  
51  
52  
53  
54  
55  
56  
57  
58  
59  
60

## Results

In total, 148 patients were included in the final cohort analysis (Supplemental Figure 1). Baseline characteristics are presented in Table 1. The majority of patients were African American and non-Hispanic, and the most common comorbidities were hypertension, Diabetes mellitus, and obesity. Absolute standardized differences between delirium and non-delirium groups were largest ( $>.30$ ) for sex, race, and weight. The highest proportion of patients in the delirium group was African American ( $n=54$ , 50%).

### *Delirium and Neuropsychological Outcomes*

Delirium incidence was high in the cohort (108/148, 73%), and median (interquartile range) duration was 10 (4 – 17) days (Table 2). Delirium prevention activities occurred relatively infrequently, with estimated unit protocol compliance rates less than 50% for each intervention reported (see Table 2 legend for description of protocol activity schedule). The mobility exercise activity compliance rate (%) was significantly lower in the delirium group (37% [26 – 55]) compared to the non-delirium group (62% [31 – 152];  $p=.009$ ). Likewise, daily promotion of visual and hearing aids occurred less frequently in the delirium group (27% [13 – 63]) compared to the non-delirium group (77% [14 – 213];  $p=.005$ ). New antidepressant use was more common for those with delirium (27/108, 25%) compared to those without delirium (3/40, 7.5%;  $p=.01$ ). Similarly, a psychiatry consult was obtained for 21/108 (19%) delirious patients compared to 0/40 (0%) in the non-delirium group ( $p=.003$ ). Lastly, no evidence of delirium reversal or improvement was reported for more than 30% of patients during index hospitalization.

### *Hospitalization and Post-Discharge Outcomes*

Median length of hospitalization was 25 (13 – 48) days, and median length of ICU stay was 15 (7 – 31) days across the cohort (Table 3). Length of hospitalization, ICU length of stay, and duration of mechanical ventilation were all significantly prolonged in patients experiencing delirium (Table 3). Correspondingly, sedative-hypnotic use was higher in patients with delirium. Delirious patients demonstrated higher white blood cell counts, c-reactive protein levels, and d-dimer levels compared to non-delirious patients. Less than half of patients were ultimately discharged home, and the most common disposition for those with delirium was a skilled care facility (41/108, 38%) after discharge (Table 3).

Neuropsychological outcomes after discharge are reported in Table 4. Among patients who were still alive and available to complete survey materials, nearly 25% of patients (4/17) scored positive for delirium based on family assessment (FAM-CAM), and all of these patients were delirious during hospitalization. Similarly, approximately 23% of patients (5/22) demonstrated either questionable impairment or impairment consistent with dementia based on the Short Blessed Test, and all five of these patients were also delirious during hospitalization. Of note, three of these five patients also screened positive for delirium based on the FAM-CAM. Lastly, 12% of patients (3/25) screened positive for depression after discharge. The three patients who screened positive also experienced delirium during ICU admission.

### *Neuroradiological Findings*

In total, 47 patients underwent neuroimaging during hospitalization. Neuroimaging studies were ordered at the discretion of clinical care teams based on clinical assessment. No standardized neuroimaging protocols were in place for patients with COVID-19. The majority of imaging results were unremarkable or demonstrated incidental findings unrelated to COVID-19. However, some notable findings were present. A brain MRI was ordered for a patient with COVID-19 pneumonia and worsening encephalopathy (i.e., no response to commands or noxious stimulus). Imaging revealed abnormal fluid attenuated inversion recovery (FLAIR) hyperintensity affecting the occipital and temporal lobes (Figures 1A, 1B), microhaemorrhage in the splenium of the corpus callosum (Figures 1B, 1C) and posterior leptomeningeal enhancement (Figures 1C, 1D), suggestive of encephalitis. A brain MRI was ordered for another patient presenting with seizures and recent COVID-19 diagnosis. Results revealed diffuse dural thickening and enhancement (Supplemental Figure 2A) one day prior to positive COVID testing. The differential diagnosis included intracranial hypotension, inflammation, infection, and neoplastic processes. No definitive diagnosis was reached, though this enhancement resolved approximately one month later (Supplemental Figure 2B). Lastly, one patient demonstrated diffuse parenchymal abnormalities on MRI suggestive of bilateral hypoxic-ischemic injury after multiple cardiopulmonary arrests (Supplemental Figure 3). A non-contrast head CT two weeks later demonstrated poor sulcation bilaterally, suggesting global hypoxic-ischemic injury (Supplemental Figure 4).

## Discussion

In a cohort of ICU patients with COVID-19, delirium was a common complication, affecting more than 70% of patients. Furthermore, delirium was associated with prolonged hospitalization, increased length of ICU stay, discharge to skilled care facilities, and positive screens for neuropsychological impairment during the months after discharge. Delirium occurred in the setting of multiple sedative-hypnotic agents, acute inflammatory responses, deviation from delirium prevention protocols, and cerebrovascular events, which are all factors that could have further catalysed delirium precipitation. ICU liberation activities were infrequently implemented compared to the protocolised frequency expected. Overall, the burden of cognitive impairment was high in patients with COVID-19, as was the risk of related complications.

These results align with previous data demonstrating a high incidence of delirium in critically ill patients with COVID-19.<sup>1-4</sup> Moreover, the median duration of delirium (10 days) is relatively long compared to other critically ill populations.<sup>24-27</sup> Our findings also highlight the multifactorial nature of delirium risk factors. In terms of demographics, 50% of patients in the delirium group were African American. The proportion of African American patients admitted to the intensive care unit and experiencing delirium was disproportionately high compared to our expected hospital demographic profile. COVID-19 has adversely, and disproportionately, impacted racial and ethnic minority communities,<sup>28 29</sup> and our results further suggest an increased risk of attendant complications (e.g., delirium) during hospitalization. Efforts to reduce racial healthcare disparities may thus, by extension, mitigate risk of delirium and related consequences of

1  
2  
3 COVID-19. Patients experiencing delirium also demonstrated significantly increased  
4 weight, and obesity may drive organ dysfunction via immune system dysregulation.<sup>30</sup>  
5  
6 Additionally, there was a disproportionate number of female patients in the delirium  
7  
8 group (absolute standardized difference >.30). These results are discrepant from a prior  
9  
10 case series of critically ill patients with COVID-19 demonstrating an increased risk of  
11  
12 delirium with male patients.<sup>4</sup> Male sex has also been identified as an independent risk  
13  
14 factor for delirium in other patient populations, possibly due to underlying comorbidity  
15  
16 severity.<sup>31 32</sup> Whether the findings in this study are spurious or reflect an underlying  
17  
18 biological phenomenon is unclear. Further investigation is warranted to improve  
19  
20 understanding of the impact that such demographic factors on delirium risk in patients  
21  
22 with COVID-19.  
23  
24  
25  
26  
27  
28  
29  
30

31 Cognitive dysfunction may also occur as a result of direct coronavirus invasion of the  
32  
33 central nervous system<sup>6</sup> or other indirect mechanisms, such as polypharmacy, systemic  
34  
35 inflammatory responses, and cerebrovascular events. Indeed, benzodiazepine sedation  
36  
37 was common in this patient cohort, with nearly 60% of patients receiving midazolam at  
38  
39 one point during ICU admission. Lorazepam was a common sedation agent as well, and  
40  
41 benzodiazepine use is associated with delirium in critically ill patients.<sup>33-35</sup> Whether  
42  
43 benzodiazepine administration served as a driver of delirium or reflected worsening  
44  
45 agitation (prompting additional sedative agents) remains unclear. Inflammation may  
46  
47 have also contributed to delirium risk. Inflammatory markers (e.g., c-reactive protein,  
48  
49 ferritin, interleukin-6, lactate dehydrogenase) were considerably elevated in this patient  
50  
51 cohort. In fact, serum levels observed in this study aligned with – or exceeded –  
52  
53  
54  
55  
56  
57  
58  
59  
60

1  
2  
3 previously reported values in patients with severe COVID-19,<sup>25</sup> and there was MRI  
4  
5 evidence of neuroinflammation for at least two patients in this cohort. C-reactive protein  
6  
7 was elevated in delirious patients, and c-reactive protein increases blood-brain barrier  
8  
9 permeability in basic science models.<sup>36</sup> However, this was an unadjusted, bivariable  
10  
11 analysis, and confounding remains possible. Cerebral ischemia may also contribute to  
12  
13 delirium in patients with COVID-19. Severe hypoxic-ischemic injury occurred in a patient  
14  
15 who experienced multiple cardiopulmonary arrests during the course of illness. Stroke  
16  
17 has previously been reported in patients with COVID-19,<sup>37</sup> as thromboembolic  
18  
19 phenomena and cerebral malperfusion may both occur during the clinical course of  
20  
21 COVID-19. Lastly, overall illness severity may increase delirium risk. Indeed, patients  
22  
23 with delirium had prolonged hospital and ICU lengths of stay, longer duration of  
24  
25 mechanical ventilation, and were more likely to require haemodialysis. Overall, multiple  
26  
27 processes likely contribute to delirium in patients with COVID-19. Targeted case-control  
28  
29 studies with appropriate statistical modelling strategies can be conducted to determine  
30  
31 independent risk factors for delirium in this patient population.  
32  
33  
34  
35  
36  
37  
38  
39

40 Delirium prevention and management are inherently challenging for COVID-19 patients.  
41  
42 While delirium prevention bundles have been demonstrated to reduce risk,<sup>38 39</sup> unique  
43  
44 challenges posed by COVID-19 hinder the implementation of standard prevention  
45  
46 practices. Spontaneous awakening and breathing trials, for example, may not have  
47  
48 been possible due to illness severity and associated ventilator requirements. Clinicians  
49  
50 may have also been limited in terms of sedation regimen. Agitation was commonly  
51  
52 observed, and nearly 30% of patients required antipsychotics in this cohort. Agitation  
53  
54  
55  
56  
57  
58  
59  
60



1  
2  
3 and hyperactive delirium likely prompted additional sedation and prolonged use of  
4 physical restraints. Early mobility was limited given illness severity, and family  
5 engagement was not possible due to visitor policy restrictions. In-person interactions  
6 with clinicians were also limited given the intent of reducing virus transmission. As such,  
7 the culmination of disease severity, limited face-to-face time spent with patients, and  
8 visitor restriction policies likely hindered ICU liberation bundle implementation. Novel  
9 strategies for implementing delirium prevention bundles in this patient population may  
10 help to further mitigate risk and should be tested in prospective trials.  
11  
12  
13  
14  
15  
16  
17  
18  
19  
20  
21  
22  
23

24 Neuropsychological impairment after discharge was also present for some patients  
25 based on subjective reporting, caretaker assessment, and objective testing for  
26 depression and cognitive impairment. Furthermore, all patients that screened positive  
27 for possible impairment also experienced delirium in the hospital. These estimates may  
28 have been even higher, given that many patients called for post-discharge assessments  
29 were unable to be reached, refused participant, or were still admitted to skilled care  
30 facilities. In fact, a large-scale, retrospective cohort study recently demonstrated an  
31 association between COVID-19 and subsequent neurologic and psychiatric impairment  
32 in the following six months, particularly for patients with severe illness.<sup>40</sup> Whether post-  
33 discharge cognitive impairment is related specifically to COVID-19 or critical illness  
34 more broadly is unclear. Indeed, cognitive impairment is common at discharge for  
35 patients who experienced delirium while in the ICU, and delirium is present for nearly  
36 20% of patients newly admitted to acute care facilities.<sup>8 41</sup> Moreover, cognitive  
37 impairment can be present for months-to-years after acute respiratory distress  
38  
39  
40  
41  
42  
43  
44  
45  
46  
47  
48  
49  
50  
51  
52  
53  
54  
55  
56  
57  
58  
59  
60

1  
2  
3 syndrome and sepsis,<sup>42-44</sup> and symptoms of depression and post-traumatic stress  
4  
5 disorder are commonly reported among ICU survivors.<sup>45</sup> Neuropsychological  
6  
7 impairment after discharge may thus, in part, reflect critical illness, rather than  
8  
9 pathophysiologic insults specific to COVID-19. Additional research is needed to  
10  
11 disambiguate these possibilities. Nonetheless, ICU patients with COVID-19 experience  
12  
13 considerable neuropsychological burden both during and after hospitalization. Ongoing  
14  
15 longitudinal COVID-19 registry studies<sup>37 46</sup> will thus be important for (1) identifying such  
16  
17 vulnerable patients who may require long-term care and resources and (2)  
18  
19 understanding the underlying aetiology of cognitive decline in this patient population  
20  
21  
22  
23  
24  
25

26 The strengths of this study include identification of potential delirium risk factors,  
27  
28 characterization of delirium prevention strategies, and post-discharge outcomes. Data  
29  
30 were also representative of an academic tertiary care centre with nearly 150 patients. A  
31  
32 validated, standardized chart review method was used to identify delirium,<sup>23</sup> and the  
33  
34 study measures used to characterize cognitive function, such as the FAM-CAM, Short  
35  
36 Blessed Test, and PROMIS assessments, are standard measures that increase  
37  
38 confidence in the results.  
39  
40  
41  
42  
43

44 In terms of limitations, this was a single-centre analysis, and the results are restricted to  
45  
46 the institution studied and intensive care units only. The study was not conducted with a  
47  
48 matched control cohort, as this was a descriptive analysis. Results from this study can  
49  
50 be used to inform future study designs focused on identifying risk factors for delirium in  
51  
52 this population. Delirium was assessed retrospectively for this study, and such  
53  
54  
55  
56  
57  
58  
59  
60

1  
2  
3 retrospective techniques are not equivalent to prospective evaluation by an expert using  
4 gold-standard, Diagnostic and Statistical Manual of Mental Disorders criteria.<sup>47</sup>  
5

6  
7 Evidence for delirium reversal was also predicated on chart review and may have been  
8 underestimated. Delirium was also not differentiated from other encephalopathic states,  
9  
10 which is neurobiologically challenging and outside of the scope of the current study.  
11  
12

13  
14 One patient was heavily sedated prior to death, and no formal delirium analysis was  
15 conducted. The post-discharge telephone-based assessments served as screening  
16 tools rather than thorough neuropsychological testing batteries. As such, these post-  
17 discharge results are preliminary and warrant rigorous, follow-up analysis. Additionally,  
18  
19 neuropsychological impairment may have been present at baseline for some patients,  
20  
21 particularly for those with previous neurological disorders. Baseline neuropsychological  
22 testing was not possible for this study. Lastly, data were limited for post-discharge  
23  
24 cognitive outcomes, as more than half of patients called were unavailable to complete  
25  
26 assessments.  
27  
28  
29  
30  
31  
32  
33  
34  
35  
36  
37

38 In summary, delirium is common complication of COVID-19 with multiple contributing  
39 factors. Furthermore, neuropsychological impairment may persist in some patients after  
40 discharge. Further research should aim to identify independent risk factors in this  
41  
42 population and novel, effective prevention strategies.  
43  
44  
45  
46  
47  
48  
49  
50  
51  
52  
53  
54  
55  
56  
57  
58  
59  
60

### **Data Availability Statement**

Data will be made available upon request via Data Use Agreement. No additional unpublished data are available.

### **Ethics Approval**

Approval for this study was obtained from the University of Michigan Medical School Institutional Review Board (HUM00182646). A Health Insurance Portability and Accountability Act waiver was granted to retrospectively review patient medical records, and informed consent was not required for retrospective chart review. Patients who agreed to complete telephone surveys after discharge were consented over the telephone prior to survey administration using a comprehensive consent document. A waiver of documentation of consent was approved in conjunction with Institutional Review Board approval and as required by U.S. Department of Health and Human Services regulations and policy

**Author contributions:**

The study was originally conceived by J.R., A.M., M.Z., and P.E.V. Data acquisition was conducted by J.R., A.M., M.Z., J.B., M.H.C., Y.A., and P.E.V. Data analysis was conducted by J.R., A.M., M.Z., J.B., M.H.C., M.I., Y.A., G.M., and P.E.V. Final statistical analysis was conducted by G.M. and P.E.V. Neuroimaging studies were acquired and analyzed by R.L., and the final neuroimaging figures were generated by R.L. and P.E.V. All authors contributed to the manuscript writing, critically reviewed the manuscript for intellectual content, and approved the final manuscript.

**Acknowledgments:**

We would like to acknowledge Dr Michael Kenes (PharmD, BCPS, BCCCP) and Ms. Margaret Diehl for assistance with medical chart data extraction.

## References

1. Helms J, Kremer S, Merdji H, et al. Neurologic features in severe SARS-CoV-2 infection. *N Engl J Med* 2020;**382**:2268-70.
2. Mao L, Jin H, Wang M, et al. Neurologic manifestations of hospitalized patients with Coronavirus Disease 2019 in Wuhan, China. *JAMA Neurol* 2020;**77**:683-90.
3. Varatharaj A, Thomas N, Ellul MA, et al. Neurological and neuropsychiatric complications of COVID-19 in 153 patients: a UK-wide surveillance study. *Lancet Psychiatry* 2020;**7**:875-82.
4. Helms J, Kremer S, Merdji H, et al. Delirium and encephalopathy in severe COVID-19: a cohort analysis of ICU patients. *Crit Care* 2020;**24**:491.
5. Liotta EM, Batra A, Clark JR, et al. Frequent neurologic manifestations and encephalopathy-associated morbidity in COVID-19 patients. *Ann Clin Transl Neurol* 2020;**7**:2221-30.
6. Bergmann CC, Lane TE, Stohlman SA. Coronavirus infection of the central nervous system: Host-virus stand-off. *Nat Rev Microbiol* 2006;**4**:121-32.
7. Pan Y, Yan J, Jiang Z, et al. Incidence, risk factors, and cumulative risk of delirium among ICU patients: a case-control study. *Int J Nurs Sci* 2019;**6**:247-51.
8. Ely EW, Shintani A, Truman B, et al. Delirium as a predictor of mortality in mechanically ventilated patients in the intensive care unit. *JAMA* 2004;**291**:1753-62.
9. Girard TD, Jackson JC, Pandharipande PP, et al. Delirium as a predictor of long-term cognitive impairment in survivors of critical illness. *Crit Care Med* 2010;**38**:1513-20.

- 1  
2  
3 10. Brummel NE, Jackson JC, Pandharipande PP, et al. Delirium in the ICU and subsequent  
4 long-term disability among survivors of mechanical ventilation. *Crit Care Med* 2014;**42**:369-  
5 77.  
6  
7  
8  
9  
10 11. von Elm E, Altman DG, Egger M, et al. The Strengthening the Reporting of Observational  
11 Studies in Epidemiology (STROBE) statement: Guidelines for reporting observational  
12 studies. *Lancet* 2007;**370**:1453-7.  
13  
14  
15  
16  
17 12. Siew ED, Fissell WH, Tripp CM, et al. Acute kidney injury as a risk factor for delirium and  
18 coma during critical illness. *Am J Respir Crit Care Med* 2017;**195**:1597-607.  
19  
20  
21  
22  
23 13. Wintermann GB, Rosendahl J, Weidner K, et al. Predictors of major depressive disorder  
24 following intensive care of chronically critically ill patients. *Crit Care Res Pract*  
25 2018;**2018**:1586736.  
26  
27  
28  
29  
30 14. Marra A, Ely EW, Pandharipande PP, et al. The ABCDEF bundle in critical care. *Crit Care*  
31 *Clin* 2017;**33**:225-43.  
32  
33  
34  
35 15. Pandharipande P, Banerjee A, McGrane S, et al. Liberation and animation for ventilated ICU  
36 patients: The ABCDE bundle for the back-end of critical care. *Crit Care* 2010;**14**:157.  
37  
38  
39  
40  
41 16. Maybrier HR, Mickle AM, Escallier KE, et al. Reliability and accuracy of delirium  
42 assessments among investigators at multiple international centres. *BMJ Open*  
43 2018;**8**:e023137.  
44  
45  
46  
47  
48 17. Cella D, Yount S, Rothrock N, et al. The patient-reported outcomes measurement  
49 information system (PROMIS): Progress of an NIH roadmap cooperative group during its first  
50 two years. *Med Care* 2007;**45**:S3-s11.  
51  
52  
53  
54  
55  
56  
57  
58  
59  
60

- 1  
2  
3 18. Katzman R, Brown T, Fuld P, et al. Validation of a short orientation-memory-concentration  
4 test of cognitive impairment. *Am J Psychiatry* 1983;**140**:734-9.  
5  
6  
7  
8 19. Steis MR, Evans L, Hirschman KB, et al. Screening for delirium using family caregivers:  
9 Convergent validity of the family confusion assessment method and interviewer-rated  
10 confusion assessment method. *J Am Geriatr Soc* 2012;**60**:2121-6.  
11  
12  
13  
14  
15 20. Kroenke K, Spitzer RL, Williams JB. The PHQ-9: Validity of a brief depression severity  
16 measure. *J Gen Intern Med* 2001;**16**:606-13.  
17  
18  
19  
20  
21 21. Levis B, Benedetti A, Thombs BD. Accuracy of patient health questionnaire-9 (PHQ-9) for  
22 screening to detect major depression: Individual participant data meta-analysis. *BMJ*  
23 2019;**365**:l1476.  
24  
25  
26  
27  
28 22. Inouye SK, van Dyck CH, Alessi CA, et al. Clarifying confusion: The Confusion Assessment  
29 Method. A new method for detection of delirium. *Ann Intern Med* 1990;**113**:941-8.  
30  
31  
32  
33 23. Inouye SK, Leo-Summers L, Zhang Y, et al. A chart-based method for identification of  
34 delirium: Validation compared with interviewer ratings using the confusion assessment  
35 method. *J Am Geriatr Soc* 2005;**53**:312-8.  
36  
37  
38  
39  
40  
41 24. Hsieh SJ, Soto GJ, Hope AA, et al. The association between acute respiratory distress  
42 syndrome, delirium, and in-hospital mortality in intensive care unit patients. *Am J Respir Crit*  
43 *Care Med* 2015;**191**:71-8.  
44  
45  
46  
47  
48 25. Brück E, Schandl A, Bottai M, et al. The impact of sepsis, delirium, and psychological  
49 distress on self-rated cognitive function in icu survivors-a prospective cohort study. *J*  
50 *Intensive Care* 2018;**6**:2.  
51  
52  
53  
54  
55  
56  
57  
58  
59  
60



- 1  
2  
3 26. Gamberini M, Bolliger D, Lurati Buse GA, et al. Rivastigmine for the prevention of  
4 postoperative delirium in elderly patients undergoing elective cardiac surgery--a randomized  
5 controlled trial. *Crit Care Med* 2009;**37**:1762-8.  
6  
7  
8  
9  
10 27. Ely EW, Girard TD, Shintani AK, et al. Apolipoprotein e4 polymorphism as a genetic  
11 predisposition to delirium in critically ill patients. *Crit Care Med* 2007;**35**:112-7.  
12  
13  
14  
15 28. Price-Haywood EG, Burton J, Fort D, et al. Hospitalization and mortality among black  
16 patients and white patients with COVID-19. *N Engl J Med* 2020;**382**:2534-43.  
17  
18  
19  
20 29. Millett GA, Jones AT, Benkeser D, et al. Assessing differential impacts of COVID-19 on  
21 black communities. *Ann Epidemiol* 2020;**47**:37-44.  
22  
23  
24  
25 30. Huizinga GP, Singer BH, Singer K. The collision of meta-inflammation and SARS-CoV-2  
26 pandemic infection. *Endocrinology* 2020;**161**:  
27  
28  
29  
30 31. Oh ES, Sieber FE, Leoutsakos JM, et al. Sex differences in hip fracture surgery:  
31 Preoperative risk factors for delirium and postoperative outcomes. *J Am Geriatr Soc*  
32 2016;**64**:1616-21.  
33  
34  
35  
36 32. Elie M, Cole MG, Primeau FJ, et al. Delirium risk factors in elderly hospitalized patients. *J*  
37 *Gen Intern Med* 1998;**13**:204-12.  
38  
39  
40  
41 33. Pisani MA, Murphy TE, Araujo KL, et al. Benzodiazepine and opioid use and the duration of  
42 intensive care unit delirium in an older population. *Crit Care Med* 2009;**37**:177-83.  
43  
44  
45  
46 34. Zaal IJ, Devlin JW, Hazelbag M, et al. Benzodiazepine-associated delirium in critically ill  
47 adults. *Intensive Care Med* 2015;**41**:2130-7.  
48  
49  
50  
51  
52  
53  
54  
55  
56  
57  
58  
59  
60

- 1  
2  
3 35. Pandharipande P, Shintani A, Peterson J, et al. Lorazepam is an independent risk factor for  
4 transitioning to delirium in intensive care unit patients. *Anesthesiology* 2006;**104**:21-6.  
5  
6  
7  
8 36. Hsueh H, Kastin AJ, Mishra PK, et al. C-reactive protein increases BBB permeability:  
9 Implications for obesity and neuroinflammation. *Cell Physiol Biochem* 2012;**30**:1109-19.  
10  
11  
12  
13 37. Ntaios G, Michel P, Georgiopoulos G, et al. Characteristics and outcomes in patients with  
14 COVID-19 and acute ischemic stroke: The global COVID-19 stroke registry. *Stroke*  
15 2020;**51**:e254-e58.  
16  
17  
18  
19  
20  
21 38. Ely EW. The ABCDEF bundle: Science and philosophy of how ICU liberation serves patients  
22 and families. *Crit Care Med* 2017;**45**:321-30.  
23  
24  
25  
26 39. Barnes-Daly MA, Phillips G, Ely EW. Improving hospital survival and reducing brain  
27 dysfunction at seven California community hospitals: Implementing PAD guidelines via the  
28 ABCDEF bundle in 6,064 patients. *Crit Care Med* 2017;**45**:171-78.  
29  
30  
31  
32  
33 40. Taquet M, Geddes JR, Husain M, et al. 6-month neurological and psychiatric outcomes in  
34 236 379 survivors of COVID-19: a retrospective cohort study using electronic health records.  
35 *Lancet Psychiatry* 2021;**8**:416-27.  
36  
37  
38  
39  
40  
41 41. Kiely DK, Bergmann MA, Murphy KM, et al. Delirium among newly admitted postacute  
42 facility patients: Prevalence, symptoms, and severity. *J Gerontol A Biol Sci Med Sci*  
43 2003;**58**:M441-5.  
44  
45  
46  
47  
48 42. Hopkins RO, Weaver LK, Collingridge D, et al. Two-year cognitive, emotional, and quality-  
49 of-life outcomes in acute respiratory distress syndrome. *Am J Respir Crit Care Med*  
50 2005;**171**:340-7.  
51  
52  
53  
54  
55  
56  
57  
58  
59  
60

- 1  
2  
3 43. Ehlenbach WJ, Hough CL, Crane PK, et al. Association between acute care and critical  
4 illness hospitalization and cognitive function in older adults. *JAMA* 2010;**303**:763-70.  
5  
6  
7  
8 44. Iwashyna TJ, Ely EW, Smith DM, et al. Long-term cognitive impairment and functional  
9 disability among survivors of severe sepsis. *JAMA* 2010;**304**:1787-94.  
10  
11  
12  
13 45. Hatch R, Young D, Barber V, et al. Anxiety, depression and post traumatic stress disorder  
14 after critical illness: a UK-wide prospective cohort study. *Crit Care* 2018;**22**:310.  
15  
16  
17  
18 46. Román GC, Reis J, Spencer PS, et al. Covid-19 international neurological registries. *Lancet*  
19 *Neurol* 2020;**19**:484-85.  
20  
21  
22  
23 47. American Psychiatric Association. *Diagnostic and Statistical Manual of Mental Disorders* (5<sup>th</sup>  
24 edition). Arlington, VA 2013. <https://doi.org/10.1176/appi.books.9780890425596>  
25  
26  
27  
28  
29  
30  
31  
32  
33  
34  
35  
36  
37  
38  
39  
40  
41  
42  
43  
44  
45  
46  
47  
48  
49  
50  
51  
52  
53  
54  
55  
56  
57  
58  
59  
60

1  
2  
3 **Figure 1.** Axial fluid-attenuated inversion recovery (FLAIR) (A, B) images at the level of the basal ganglia  
4 show abnormal FLAIR hyperintense signal (arrows) affecting the bilateral occipital, temporal lobes. This  
5 appears almost sulcal suggesting a higher protein component within the cerebrospinal fluid. Note the  
6 elevated FLAIR signal in the splenium of the corpus callosum (arrow) suggesting parenchymal insult.  
7 Axial susceptibility weighted imaging (SWI) (C) at the level of the splenium of the corpus callosum shows  
8 small areas of susceptibility (arrow) in the splenium, likely related to microhaemorrhage. Axial T1 (D)  
9 post-contrast with fat suppression at the level of the basal ganglia shows subtle, though true,  
10 enhancement (arrows) in the posterior sulci, arachnoid pial (leptomeningeal) pattern suggesting a degree  
11 of encephalitis.  
12  
13  
14  
15  
16  
17  
18  
19  
20  
21  
22  
23  
24  
25  
26  
27  
28  
29  
30  
31  
32  
33  
34  
35  
36  
37  
38  
39  
40  
41  
42  
43  
44  
45  
46  
47  
48  
49  
50  
51  
52  
53  
54  
55  
56  
57  
58  
59  
60

**Table 1.** Baseline Characteristics

|                                 | <b>All Patients<br/>(n=148)</b> | <b>Delirium<br/>(n=108)</b> | <b>No Delirium<br/>(n=40)</b> | <b>Absolute<br/>Standardized<br/>Difference</b> |
|---------------------------------|---------------------------------|-----------------------------|-------------------------------|-------------------------------------------------|
| <b>Age (IQR)</b>                | 59 (49 – 71)                    | 58 (47 – 71)                | 62 (54 – 71)                  | .26                                             |
| <b>Male sex, n (%)</b>          | 98 (66)                         | 32 (30)                     | 18 (45)                       | .32                                             |
| <b>Race, n (%)</b>              |                                 |                             |                               | .32                                             |
| Caucasian                       | 66 (45)                         | 47 (44)                     | 19 (48)                       |                                                 |
| African American                | 70 (47)                         | 54 (50)                     | 16 (40)                       |                                                 |
| Other                           | 1 (0.7)                         | 1 (0.9)                     | 0 (0)                         |                                                 |
| Not reported                    | 11 (7.4)                        | 6 (5.6)                     | 5 (13)                        |                                                 |
| <b>Ethnicity, n (%)</b>         |                                 |                             |                               | .31                                             |
| Non-Hispanic                    | 137 (93)                        | 100 (93)                    | 38 (93)                       |                                                 |
| Hispanic                        | 5 (3.4)                         | 5 (4.7)                     | 0 (0)                         |                                                 |
| Unknown/not<br>reported         | 6 (4.1)                         | 3 (2.8)                     | 3 (7.5)                       |                                                 |
| <b>Weight, kg (IQR)</b>         | 103 (83 – 127)                  | 105 (87 – 127)              | 93 (79 – 113)                 | .36                                             |
| <b>BMI (IQR)</b>                | 34 (28 – 40)                    | 34 (29 – 41)                | 31 (28 – 39)                  | .16                                             |
| <b>Comorbidities,<br/>n (%)</b> |                                 |                             |                               |                                                 |
| Asthma                          | 24 (16)                         | 17 (16)                     | 7 (18)                        | .05                                             |
| Atrial fibrillation             | 22 (15)                         | 14 (13)                     | 8 (20)                        | .19                                             |
| Cancer                          | 25 (17)                         | 20 (19)                     | 5 (13)                        | .17                                             |
| Chronic kidney<br>disease       | 40 (27)                         | 30 (28)                     | 10 (25)                       | .06                                             |
| Congestive heart<br>failure     | 19 (13)                         | 13 (12)                     | 6 (15)                        | .09                                             |

|                          |          |         |         |     |
|--------------------------|----------|---------|---------|-----|
| COPD                     | 14 (9.5) | 8 (7.4) | 6 (15)  | .24 |
| Coronary artery disease  | 27 (18)  | 18 (17) | 9 (23)  | .15 |
| Depression               | 17 (11)  | 11 (10) | 6 (15)  | .15 |
| Diabetes mellitus        | 75 (51)  | 58 (54) | 18 (43) | .23 |
| Hypertension             | 102 (69) | 74 (66) | 29 (70) | .03 |
| Obstructive sleep apnoea | 31 (21)  | 22 (20) | 9 (23)  | .05 |
| Seizures                 | 8 (5.4)  | 5 (4.6) | 3 (7.5) | .12 |
| Stroke                   | 9 (6.1)  | 5 (4.6) | 4 (10)  | .21 |
| Substance use disorders  | 9 (6.1)  | 6 (5.6) | 3 (7.5) | .21 |
| TIA                      | 5 (3.4)  | 3 (2.8) | 2 (5)   | .12 |

Median (interquartile range, IQR) data presented. *Kg* kilograms, *BMI* body mass index, *COPD* chronic obstructive pulmonary disease, *TIA* transient ischemic attack.

**Table 2.** Delirium and Neuropsychological Outcomes

|                                                                        | <b>All Patients<br/>(n=148)</b> | <b>Delirium<br/>(n=108)</b> | <b>No Delirium<br/>(n=40)</b> | <b>P Values</b> |
|------------------------------------------------------------------------|---------------------------------|-----------------------------|-------------------------------|-----------------|
| <b>Delirium measures</b>                                               |                                 |                             |                               |                 |
| Delirium, n (%)                                                        | 108 (73)                        | 108 (100)                   | ---                           | ---             |
| Duration of delirium, days<br>(IQR)                                    | 10 (4 – 17)                     | 10 (4 – 17)                 | ---                           | ---             |
| Agitation (n, %)                                                       | --                              | 54 (50)                     | --                            | --              |
| Antipsychotic use, n (%)                                               | 43 (29%)                        | 42 (39)                     | 1 (2.5)                       | <.001           |
| Evidence of delirium reversal,<br>n (%)                                | ---                             | 71 (66)                     | ---                           | ---             |
| <b>ICU liberation bundle<br/>activity compliance rate, %<br/>(IQR)</b> |                                 |                             |                               |                 |
| Mobility exercises                                                     | 40 (28 – 67)                    | 37 (26 – 55)                | 62 (31 – 152)                 | .009            |
| Familiar objects at bedside                                            | 14 (4.4 – 31)                   | 14 (5.9 – 25)               | 18 (0 – 62)                   | .38             |
| Daily visual and hearing aids                                          | 33 (13 – 76)                    | 27 (13 – 63)                | 77 (14 – 213)                 | .005            |
| Daily spontaneous<br>awakening/breathing trials                        | 14 (2.3 – 25)                   | 14 (7.9 – 25)               | 6.7 (0 – 23)                  | .07             |
| <b>Psychiatric outcomes</b>                                            |                                 |                             |                               |                 |
| New antidepressant use, n<br>(%)                                       | 30 (20)                         | 27 (25)                     | 3 (7.5)                       | .01             |
| New psychiatry consults, n<br>(%)                                      | 21 (14)                         | 21 (19)                     | 0 (0)                         | .003            |

Delirium prevention measures are based on the standard ICU liberation bundle protocols (see text for details). Per institutional protocol, clinicians conduct mobility exercises three times daily, place familiar objects at the bedside once daily, promote visual and hearing aid use daily, and conduct daily

1  
2  
3 spontaneous awakening/breathing trials daily (if eligible). Given this schedule, compliance/occurrence  
4 rates (%) were calculated for each patient by calculating the total number of activities charted divided by  
5 the total number expected based on length of ICU stay (day of ICU discharge was not counted). *IQR*,  
6  
7 interquartile range.  
8  
9  
10  
11  
12  
13  
14  
15  
16  
17  
18  
19  
20  
21  
22  
23  
24  
25  
26  
27  
28  
29  
30  
31  
32  
33  
34  
35  
36  
37  
38  
39  
40  
41  
42  
43  
44  
45  
46  
47  
48  
49  
50  
51  
52  
53  
54  
55  
56  
57  
58  
59  
60

For peer review only



**Table 3.** Hospitalization

|                                                   | <b>All Patients<br/>(n=148)</b> | <b>Delirium<br/>(n=108)</b> | <b>No Delirium<br/>(n=40)</b> | <b>P Value</b> |
|---------------------------------------------------|---------------------------------|-----------------------------|-------------------------------|----------------|
| <b>Length of hospitalization, days (IQR)</b>      | 25 (13 – 48)                    | 31 (18 – 52)                | 11 (7 – 25)                   | <.001          |
| <b>Length of ICU stay, days (IQR)</b>             | 15 (7 – 31)                     | 19 (12 – 38)                | 4 (2 – 8)                     | <.001          |
| <b>Ventilator time, days, (IQR)</b>               | 12 (3 – 28)                     | 18 (10 – 29)                | 0 (0 – 7)                     | <.001          |
| <b>Required haemodialysis, n (%)</b>              | 45 (30)                         | 40 (37)                     | 5 (13)                        | .004           |
| <b>Sedative-hypnotics, n (%)</b>                  |                                 |                             |                               |                |
| Propofol                                          | 113 (76)                        | 98 (91)                     | 15 (38)                       | <.001          |
| Midazolam                                         | 87 (59)                         | 75 (69)                     | 12 (30)                       | <.001          |
| Dexmedetomidine                                   | 97 (66)                         | 89 (82)                     | 8 (20)                        | <.001          |
| Lorazepam                                         | 58 (39)                         | 52 (49)                     | 6 (15)                        | <.001          |
| <b>Laboratories</b>                               |                                 |                             |                               |                |
| WBC<br>(n=148)<br>4.0 – 10.0 (K/ $\mu$ L)         | 10.1 (7.8 – 13.9)               | 11.3 (8.4 – 15.1)           | 8.7 (6.3 – 10.9)              | .002           |
| C-reactive protein<br>(n=145)<br>1.0 – 3.0 (mg/L) | 10.2 (5.1 – 18.0)               | 11.7 (5.3 – 20.7)           | 8.9 (4.3 – 13.9)              | .03            |
| Ferritin<br>(n=147)                               | 1,208 (591 – 1,786)             | 1276 (714 – 1990)           | 994 (478 – 1406)              | .09            |

|                                                         |                        |                        |                    |      |
|---------------------------------------------------------|------------------------|------------------------|--------------------|------|
| 18.0 – 320.0 (ng/mL)                                    |                        |                        |                    |      |
| Lactate<br>dehydrogenase<br>(n=135)<br>120 – 240 (IU/L) | 455 (328 – 572)        | 458 (343 – 633)        | 398 (276 – 515)    | .05  |
| IL-6<br>(n=52)<br>< 17.4 pg/mL                          | 69.4 (27.5 –<br>201.3) | 69.4 (32.6 –<br>186.7) | 62.7 (19.9 – 361)  | .77  |
| D-dimer<br>(n=142)<br>< 0.59 mg/L                       | 3.1 (1.5 – 6.8)        | 3.67 (1.84 – 7.75)     | 1.65 (1.27 – 4.41) | .002 |
| <b>Disposition, n (%)</b>                               |                        |                        |                    | .03  |
| Home (unassisted)                                       | 62 (42)                | 40 (37)                | 22 (55)            |      |
| Skilled care facility                                   | 47 (32)                | 41 (38)                | 6 (15)             |      |
| Death                                                   | 39 (26)                | 27 (25)                | 12 (30)            |      |

Institutional reference ranges are reported for laboratory values. *ICU* intensive care unit, *IQR* interquartile range, *WBC* white blood cell count, *IL-6* interleukin-6.

**Table 4.** Post-Discharge Neuropsychological Outcomes†

|                                                                               | <b>All Patients<br/>(n=148)</b> | <b>Delirium<br/>(n=108)</b> | <b>No Delirium<br/>(n=40)</b> |
|-------------------------------------------------------------------------------|---------------------------------|-----------------------------|-------------------------------|
| Positive FAM-CAM, n (%)<br>(n=17)                                             | 4 (24)                          | 4 (31)                      | 0 (0)                         |
| PROMIS 4A Cognitive<br>Abilities Score, median<br>(IQR)<br>(n=25)             | 16 (10 – 20)                    | 17 (9 – 20)                 | 14 (6)                        |
| Short Blessed Test –<br>Normal, n (%)<br>(n=22)                               | 17 (74)                         | 10 (67)                     | 7 (100)                       |
| Short Blessed Test –<br>questionable cognitive<br>impairment, n (%)<br>(n=22) | 2 (8.7)                         | 2 (13)                      | 0 (0)                         |
| Short Blessed Test –<br>cognitive impairment, n (%)<br>(n=22)                 | 3 (13)                          | 3 (20)                      | 0 (0)                         |
| PHQ-9 screen positive, n,<br>(%)<br>(n=25)                                    | 3 (12)                          | 3 (17)                      | 0 (0)                         |

*FAM-CAM* Family-based Confusion Assessment Method for delirium, *PROMIS* Patient-Reported Outcomes Measurement Information System, *PHQ* Patient Health Questionnaire. Initial phone calls were placed between 30 and 60 days after hospital discharge, and the average time to survey completion was 83 days post-discharge. †For each post-discharge survey, proportions are calculated based on the total numbers of surveys completed. In total, 25 surveys were completed for the PROMIS 4A test, 25 surveys

1  
2  
3 were completed for the PHQ-9, 17 surveys were completed for the FAM-CAM, and 22 surveys were  
4  
5 completed for the Short Blessed Test. Reasons for not completing a test included the following: unable to  
6  
7 contact (n=54), patient deceased (n=43), refusal (n=18), unable to provide consent (n=5), and admission  
8  
9 to skilled care facility (n=3).  
10  
11  
12  
13  
14  
15  
16  
17  
18  
19  
20  
21  
22  
23  
24  
25  
26  
27  
28  
29  
30  
31  
32  
33  
34  
35  
36  
37  
38  
39  
40  
41  
42  
43  
44  
45  
46  
47  
48  
49  
50  
51  
52  
53  
54  
55  
56  
57  
58  
59  
60



Figure 1 - Axial fluid-attenuated inversion recovery (FLAIR) (A, B) images at the level of the basal ganglia show abnormal FLAIR hyperintense signal (arrows) affecting the bilateral occipital, temporal lobes. This appears almost sulcal suggesting a higher protein component within the cerebrospinal fluid. Note the elevated FLAIR signal in the splenium of the corpus callosum (arrow) suggesting parenchymal insult. Axial susceptibility weighted imaging (SWI) (C) at the level of the splenium of the corpus callosum shows small areas of susceptibility (arrow) in the splenium, likely related to microhemorrhage. Axial T1 (D) post-contrast with fat suppression at the level of the basal ganglia shows subtle, though true, enhancement (arrows) in the posterior sulci, arachnoid pial (leptomeningeal) pattern suggesting a degree of encephalitis.

202x235mm (300 x 300 DPI)

Supplemental Table 1 – STROBE Checklist

|                           | Item No | Recommendation                                                                                                                                                                             | Page #                   |
|---------------------------|---------|--------------------------------------------------------------------------------------------------------------------------------------------------------------------------------------------|--------------------------|
| <b>Title and abstract</b> | 1       | (a) Indicate the study’s design with a commonly used term in the title or the abstract                                                                                                     | 1; Title page            |
|                           |         | (b) Provide in the abstract an informative and balanced summary of what was done and what was found                                                                                        | 3                        |
| <b>Introduction</b>       |         |                                                                                                                                                                                            |                          |
| Background/rationale      | 2       | Explain the scientific background and rationale for the investigation being reported                                                                                                       | 6                        |
| Objectives                | 3       | State specific objectives, including any prespecified hypotheses                                                                                                                           | 6,7                      |
| <b>Methods</b>            |         |                                                                                                                                                                                            |                          |
| Study design              | 4       | Present key elements of study design early in the paper                                                                                                                                    | 8                        |
| Setting                   | 5       | Describe the setting, locations, and relevant dates, including periods of recruitment, exposure, follow-up, and data collection                                                            | 8                        |
| Participants              | 6       | (a) <i>Cohort study</i> —Give the eligibility criteria, and the sources and methods of selection of participants. Describe methods of follow-up                                            | 8-11                     |
|                           |         | <i>Case-control study</i> —Give the eligibility criteria, and the sources and methods of case ascertainment and control selection. Give the rationale for the choice of cases and controls |                          |
|                           |         | <i>Cross-sectional study</i> —Give the eligibility criteria, and the sources and methods of selection of participants                                                                      |                          |
|                           |         | (b) <i>Cohort study</i> —For matched studies, give matching criteria and number of exposed and unexposed                                                                                   | N/A                      |
|                           |         | <i>Case-control study</i> —For matched studies, give matching criteria and the number of controls per case                                                                                 |                          |
| Variables                 | 7       | Clearly define all outcomes, exposures, predictors, potential confounders, and effect modifiers. Give diagnostic criteria, if applicable                                                   | 9-12                     |
| Data sources/ measurement | 8*      | For each variable of interest, give sources of data and details of methods of assessment (measurement). Describe comparability of assessment methods if there is more than one group       | 10-12                    |
| Bias                      | 9       | Describe any efforts to address potential sources of bias                                                                                                                                  | N/A; descriptive study   |
| Study size                | 10      | Explain how the study size was arrived at                                                                                                                                                  | 8; Supplemental Figure 1 |
| Quantitative variables    | 11      | Explain how quantitative variables were handled in the analyses. If applicable, describe which groupings were chosen and why                                                               | 9-12                     |
| Statistical methods       | 12      | (a) Describe all statistical methods, including those used to control for confounding                                                                                                      | 12                       |
|                           |         | (b) Describe any methods used to examine subgroups and interactions                                                                                                                        | N/A                      |
|                           |         | (c) Explain how missing data were addressed                                                                                                                                                | 12 (N/A)                 |
|                           |         | (d) <i>Cohort study</i> —If applicable, explain how loss to follow-up was addressed<br><i>Case-control study</i> —If applicable, explain how matching of cases and controls was addressed  | 12                       |

1  
2  
3 Cross-sectional study—If applicable, describe analytical methods taking account of sampling strategy

4 (g) Describe any sensitivity analyses

N/A

5  
6  
7  
8  
9  
10  
11  
12  
13  
14  
15  
16  
17  
18  
19  
20  
21  
22  
23  
24  
25  
26  
27  
28  
29  
30  
31  
32  
33  
34  
35  
36  
37  
38  
39  
40  
41  
42  
43  
44  
45  
46  
47

For peer review only

| <b>Results</b>    |     |                                                                                                                                                                                                                                                                                                                                                                                                               |                                                                                                                       |
|-------------------|-----|---------------------------------------------------------------------------------------------------------------------------------------------------------------------------------------------------------------------------------------------------------------------------------------------------------------------------------------------------------------------------------------------------------------|-----------------------------------------------------------------------------------------------------------------------|
| Participants      | 13* | (a) Report numbers of individuals at each stage of study—eg numbers potentially eligible, examined for eligibility, confirmed eligible, included in the study, completing follow-up, and analysed<br>(b) Give reasons for non-participation at each stage<br>(c) Consider use of a flow diagram                                                                                                               | Supplemental Figure 1<br>Supplemental Figure 1<br>Supplemental Figure 1                                               |
| Descriptive data  | 14* | (a) Give characteristics of study participants (eg demographic, clinical, social) and information on exposures and potential confounders<br>(b) Indicate number of participants with missing data for each variable of interest<br>(c) <i>Cohort study</i> —Summarise follow-up time (eg, average and total amount)                                                                                           | 13, Table 1<br>N/A<br>10 (for post-discharge timeline)                                                                |
| Outcome data      | 15* | <i>Cohort study</i> —Report numbers of outcome events or summary measures over time<br><i>Case-control study</i> —Report numbers in each exposure category, or summary measures of exposure<br><i>Cross-sectional study</i> —Report numbers of outcome events or summary measures                                                                                                                             | 13 – 15 (Tables 1-4)<br>N/A<br>N/A                                                                                    |
| Main results      | 16  | (a) Give unadjusted estimates and, if applicable, confounder-adjusted estimates and their precision (eg, 95% confidence interval). Make clear which confounders were adjusted for and why they were included<br>(b) Report category boundaries when continuous variables were categorized<br>(c) If relevant, consider translating estimates of relative risk into absolute risk for a meaningful time period | 13 – 15 (Tables 1-4; summary statistics and descriptive analyses).<br>10 and Table 4 (post-discharge outcomes)<br>N/A |
| Other analyses    | 17  | Report other analyses done—eg analyses of subgroups and interactions, and sensitivity analyses                                                                                                                                                                                                                                                                                                                | N/A                                                                                                                   |
| <b>Discussion</b> |     |                                                                                                                                                                                                                                                                                                                                                                                                               |                                                                                                                       |
| Key results       | 18  | Summarise key results with reference to study objectives                                                                                                                                                                                                                                                                                                                                                      | 16                                                                                                                    |
| Limitations       | 19  | Discuss limitations of the study, taking into account sources of potential bias or imprecision. Discuss both direction and magnitude of any potential bias                                                                                                                                                                                                                                                    | 20-21                                                                                                                 |
| Interpretation    | 20  | Give a cautious overall interpretation of results considering objectives, limitations, multiplicity of analyses, results from similar studies, and other relevant evidence                                                                                                                                                                                                                                    | 21                                                                                                                    |
| Generalisability  | 21  | Discuss the generalisability (external validity) of the study results                                                                                                                                                                                                                                                                                                                                         | 20-21                                                                                                                 |

**Other information**



1  
2  
3 Funding 22 Give the source of funding and the role of the funders for the present study and, if applicable, for the original study 1  
4 on which the present article is based  
5  
6  
7  
8  
9  
10  
11  
12  
13  
14  
15  
16  
17  
18  
19  
20  
21  
22  
23  
24  
25  
26  
27  
28  
29  
30  
31  
32  
33  
34  
35  
36  
37  
38  
39  
40  
41  
42  
43  
44  
45  
46  
47

For peer review only

## Supplemental Figure 1

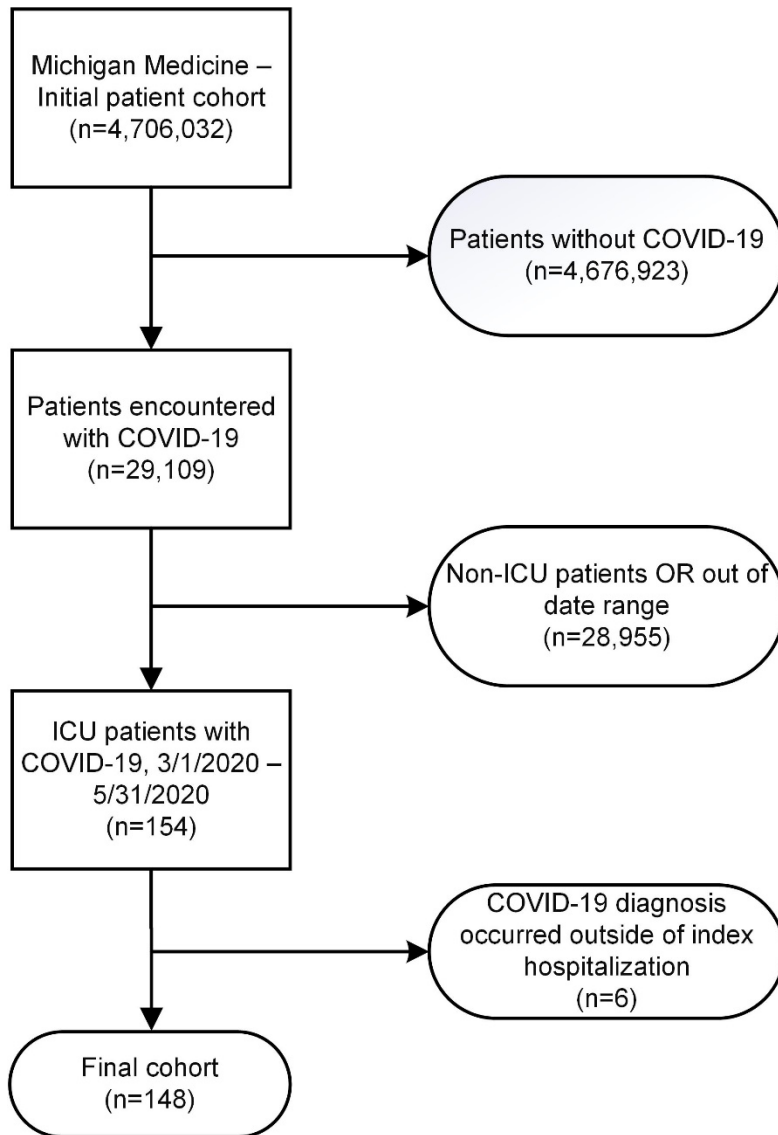

Study flow illustrated. In total, 148 patients were included for the final analysis.

## Supplemental Figure 2

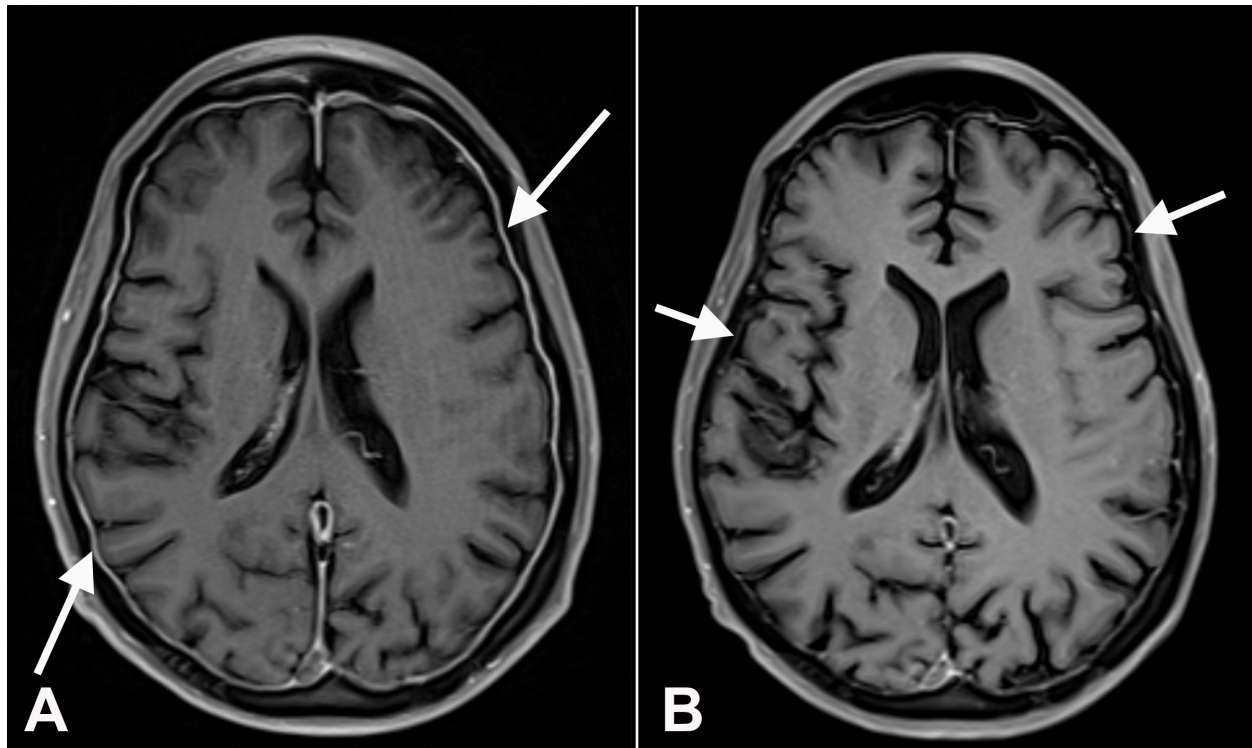

A, Axial T1 post-contrast with fat suppression images at the level of the mid lateral ventricles demonstrate smooth dural enhancement (arrows) along the bilateral cerebral convexities. B, This feature resolves one month later (arrows). The overall pattern of dura-arachnoid/pachymeningeal enhancement is non-specific, can be seen with intracranial hypotension, in the procedural setting (e.g., lumbar puncture), and other scenarios (e.g., infection, inflammation).

## Supplemental Figure 3

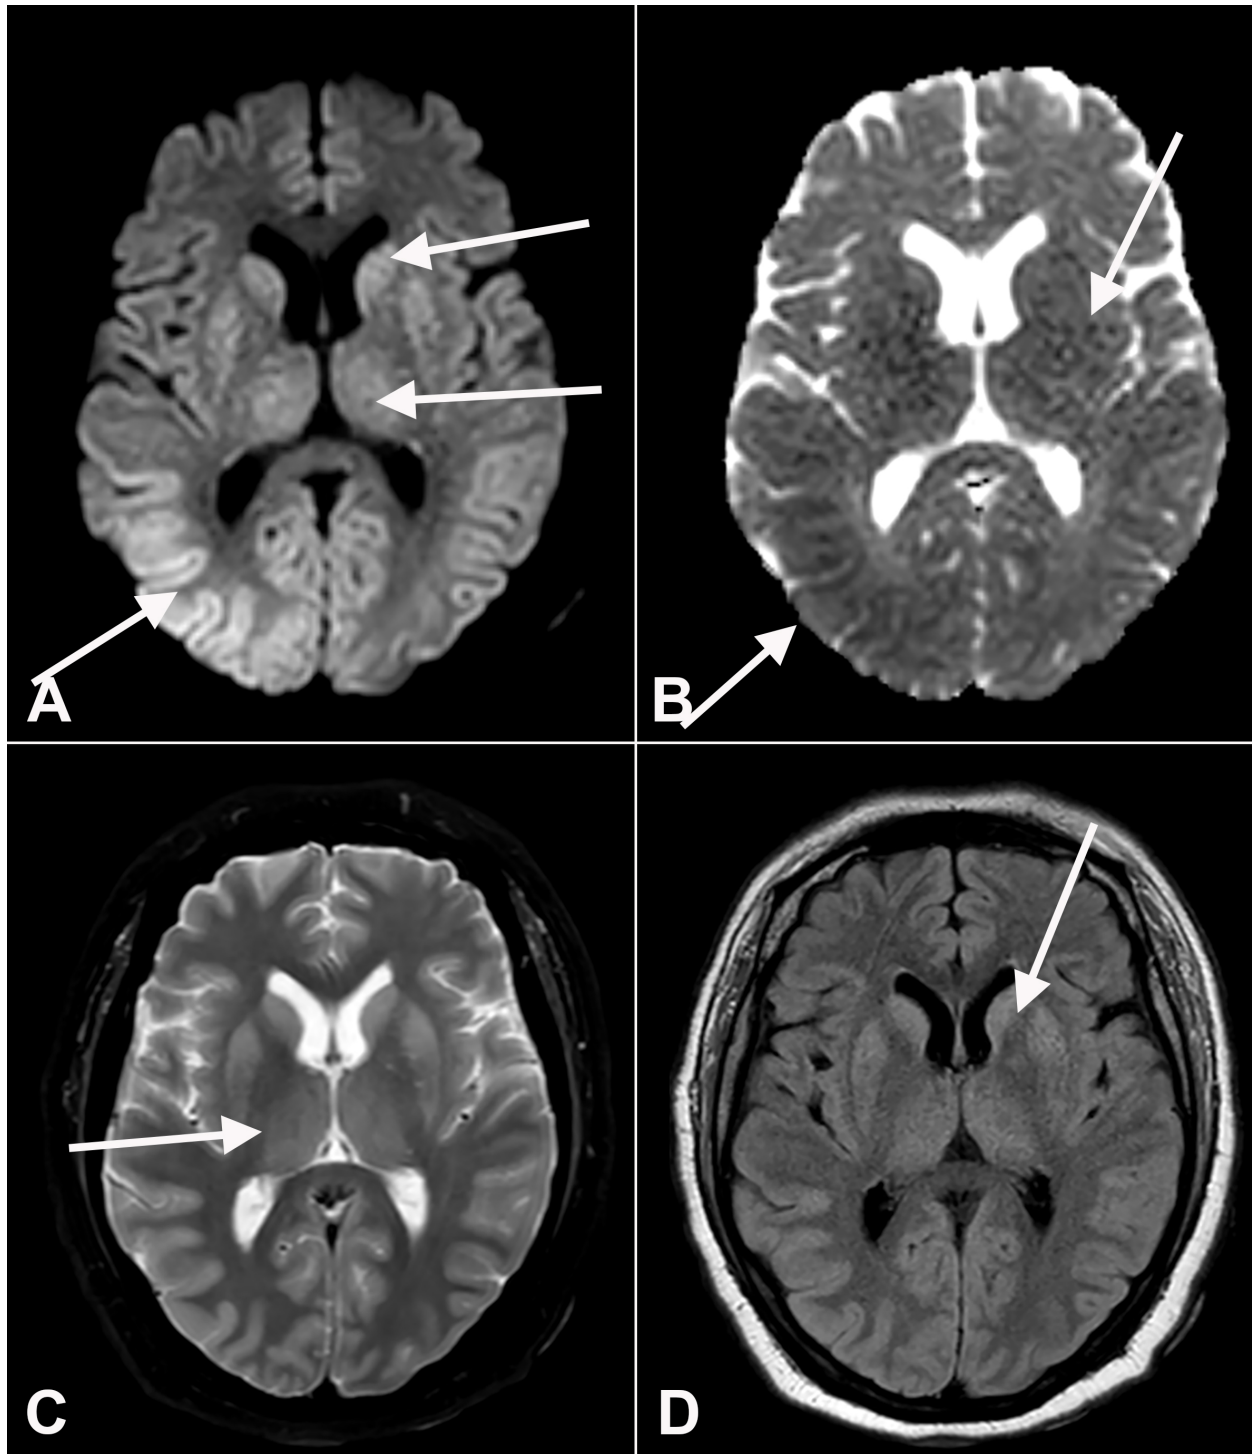

After initial non-contrast head CT (which was unremarkable), the patient had diffuse parenchymal abnormalities on MRI examination. A, Axial diffusion-weighted imaging shows hyperintense signal (arrows) at the bilateral basal ganglia, thalami, and posterior cortices, regions are hypointense (arrows)

1  
2  
3 on corresponding apparent diffusion coefficient map (B). These same locations are hyperintense on T2  
4  
5 (C) and FLAIR (D), especially at the basal ganglia and thalami.  
6  
7  
8  
9  
10  
11  
12  
13  
14  
15  
16  
17  
18  
19  
20  
21  
22  
23  
24  
25  
26  
27  
28  
29  
30  
31  
32  
33  
34  
35  
36  
37  
38  
39  
40  
41  
42  
43  
44  
45  
46  
47  
48  
49  
50  
51  
52  
53  
54  
55  
56  
57  
58  
59  
60

For peer review only

Supplemental Figure 4

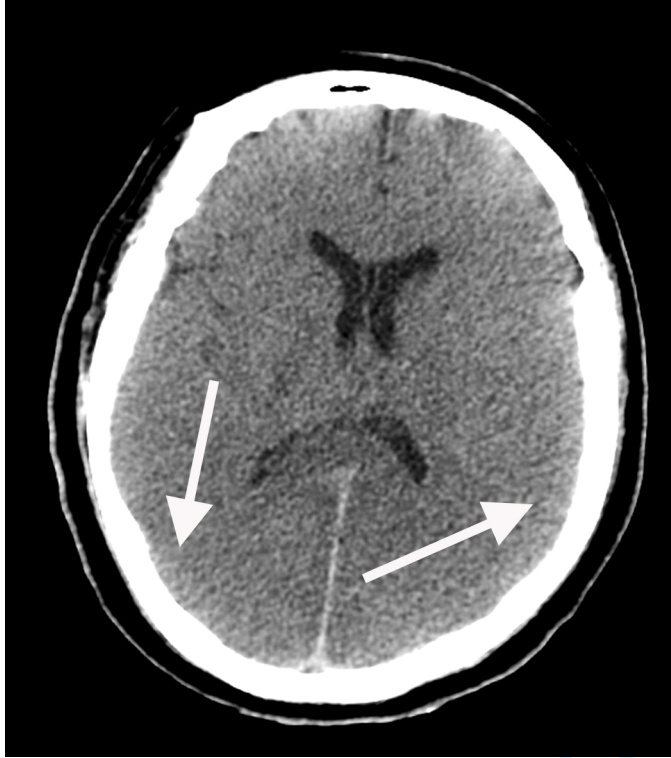

Non-contrast head CT performed approximately two weeks after cardiopulmonary arrest shows poor sulcation (arrows) bilaterally, suggesting global insult, most likely hypoxic-ischemic in etiology
