# Supplementary material for: Delirium and neuropsychological outcomes in critically Ill patients with COVID-19: a cohort study
Source: PubMed Central journal article supplement — BMJ Open. 2021 Sep 17;11(9):e050045. doi: 10.1136/bmjopen-2021-050045 (PMC8450964; doi:10.1136/bmjopen-2021-050045), 2021-09-17
Supplement: bmjopen-2021-050045supp001.pdf [file bmjopen-2021-050045supp001.pdf]

Supplemental Table 1 – STROBE Checklist

|                              | Item No | Recommendation                                                                                                                                                                             | Page #                         |
|------------------------------|---------|--------------------------------------------------------------------------------------------------------------------------------------------------------------------------------------------|--------------------------------|
| <b>Title and abstract</b>    | 1       | (a) Indicate the study's design with a commonly used term in the title or the abstract                                                                                                     | 1; Title page                  |
|                              |         | (b) Provide in the abstract an informative and balanced summary of what was done and what was found                                                                                        | 3                              |
| <b>Introduction</b>          |         |                                                                                                                                                                                            |                                |
| Background/rationale         | 2       | Explain the scientific background and rationale for the investigation being reported                                                                                                       | 6                              |
| Objectives                   | 3       | State specific objectives, including any prespecified hypotheses                                                                                                                           | 6,7                            |
| <b>Methods</b>               |         |                                                                                                                                                                                            |                                |
| Study design                 | 4       | Present key elements of study design early in the paper                                                                                                                                    | 8                              |
| Setting                      | 5       | Describe the setting, locations, and relevant dates, including periods of recruitment, exposure, follow-up, and data collection                                                            | 8                              |
| Participants                 | 6       | (a) <i>Cohort study</i> —Give the eligibility criteria, and the sources and methods of selection of participants. Describe methods of follow-up                                            | 8-11                           |
|                              |         | <i>Case-control study</i> —Give the eligibility criteria, and the sources and methods of case ascertainment and control selection. Give the rationale for the choice of cases and controls |                                |
|                              |         | <i>Cross-sectional study</i> —Give the eligibility criteria, and the sources and methods of selection of participants                                                                      |                                |
|                              |         | (b) <i>Cohort study</i> —For matched studies, give matching criteria and number of exposed and unexposed                                                                                   | N/A                            |
|                              |         | <i>Case-control study</i> —For matched studies, give matching criteria and the number of controls per case                                                                                 |                                |
| Variables                    | 7       | Clearly define all outcomes, exposures, predictors, potential confounders, and effect modifiers. Give diagnostic criteria, if applicable                                                   | 9-12                           |
| Data sources/<br>measurement | 8*      | For each variable of interest, give sources of data and details of methods of assessment (measurement). Describe comparability of assessment methods if there is more than one group       | 10-12                          |
| Bias                         | 9       | Describe any efforts to address potential sources of bias                                                                                                                                  | N/A;<br>descriptive<br>study   |
| Study size                   | 10      | Explain how the study size was arrived at                                                                                                                                                  | 8;<br>Supplemental<br>Figure 1 |
| Quantitative<br>variables    | 11      | Explain how quantitative variables were handled in the analyses. If applicable, describe which groupings were chosen and why                                                               | 9-12                           |
| Statistical methods          | 12      | (a) Describe all statistical methods, including those used to control for confounding                                                                                                      | 12                             |
|                              |         | (b) Describe any methods used to examine subgroups and interactions                                                                                                                        | N/A                            |
|                              |         | (c) Explain how missing data were addressed                                                                                                                                                | 12 (N/A)                       |
|                              |         | (d) <i>Cohort study</i> —If applicable, explain how loss to follow-up was addressed<br><i>Case-control study</i> —If applicable, explain how matching of cases and controls was addressed  | 12                             |

---

*Cross-sectional study*—If applicable, describe analytical methods taking account of sampling strategy

(e) Describe any sensitivity analyses

N/A

| <b>Results</b>           |     |                                                                                                                                                                                                              |                                                                    |
|--------------------------|-----|--------------------------------------------------------------------------------------------------------------------------------------------------------------------------------------------------------------|--------------------------------------------------------------------|
| Participants             | 13* | (a) Report numbers of individuals at each stage of study—eg numbers potentially eligible, examined for eligibility, confirmed eligible, included in the study, completing follow-up, and analysed            | Supplemental Figure 1                                              |
|                          |     | (b) Give reasons for non-participation at each stage                                                                                                                                                         | Supplemental Figure 1                                              |
|                          |     | (c) Consider use of a flow diagram                                                                                                                                                                           | Supplemental Figure 1                                              |
| Descriptive data         | 14* | (a) Give characteristics of study participants (eg demographic, clinical, social) and information on exposures and potential confounders                                                                     | 13, Table 1                                                        |
|                          |     | (b) Indicate number of participants with missing data for each variable of interest                                                                                                                          | N/A                                                                |
|                          |     | (c) <i>Cohort study</i> —Summarise follow-up time (eg, average and total amount)                                                                                                                             | 10 (for post-discharge timeline)                                   |
| Outcome data             | 15* | <i>Cohort study</i> —Report numbers of outcome events or summary measures over time                                                                                                                          | 13 – 15 (Tables 1-4)                                               |
|                          |     | <i>Case-control study</i> —Report numbers in each exposure category, or summary measures of exposure                                                                                                         | N/A                                                                |
|                          |     | <i>Cross-sectional study</i> —Report numbers of outcome events or summary measures                                                                                                                           | N/A                                                                |
| Main results             | 16  | (a) Give unadjusted estimates and, if applicable, confounder-adjusted estimates and their precision (eg, 95% confidence interval). Make clear which confounders were adjusted for and why they were included | 13 – 15 (Tables 1-4; summary statistics and descriptive analyses). |
|                          |     | (b) Report category boundaries when continuous variables were categorized                                                                                                                                    | 10 and Table 4 (post-discharge outcomes)                           |
|                          |     | (c) If relevant, consider translating estimates of relative risk into absolute risk for a meaningful time period                                                                                             | N/A                                                                |
| Other analyses           | 17  | Report other analyses done—eg analyses of subgroups and interactions, and sensitivity analyses                                                                                                               | N/A                                                                |
| <b>Discussion</b>        |     |                                                                                                                                                                                                              |                                                                    |
| Key results              | 18  | Summarise key results with reference to study objectives                                                                                                                                                     | 16                                                                 |
| Limitations              | 19  | Discuss limitations of the study, taking into account sources of potential bias or imprecision. Discuss both direction and magnitude of any potential bias                                                   | 20-21                                                              |
| Interpretation           | 20  | Give a cautious overall interpretation of results considering objectives, limitations, multiplicity of analyses, results from similar studies, and other relevant evidence                                   | 21                                                                 |
| Generalisability         | 21  | Discuss the generalisability (external validity) of the study results                                                                                                                                        | 20-21                                                              |
| <b>Other information</b> |     |                                                                                                                                                                                                              |                                                                    |

Funding 22 Give the source of funding and the role of the funders for the present study and, if applicable, for the original study on which the present article is based 1

**Supplemental Figure 1**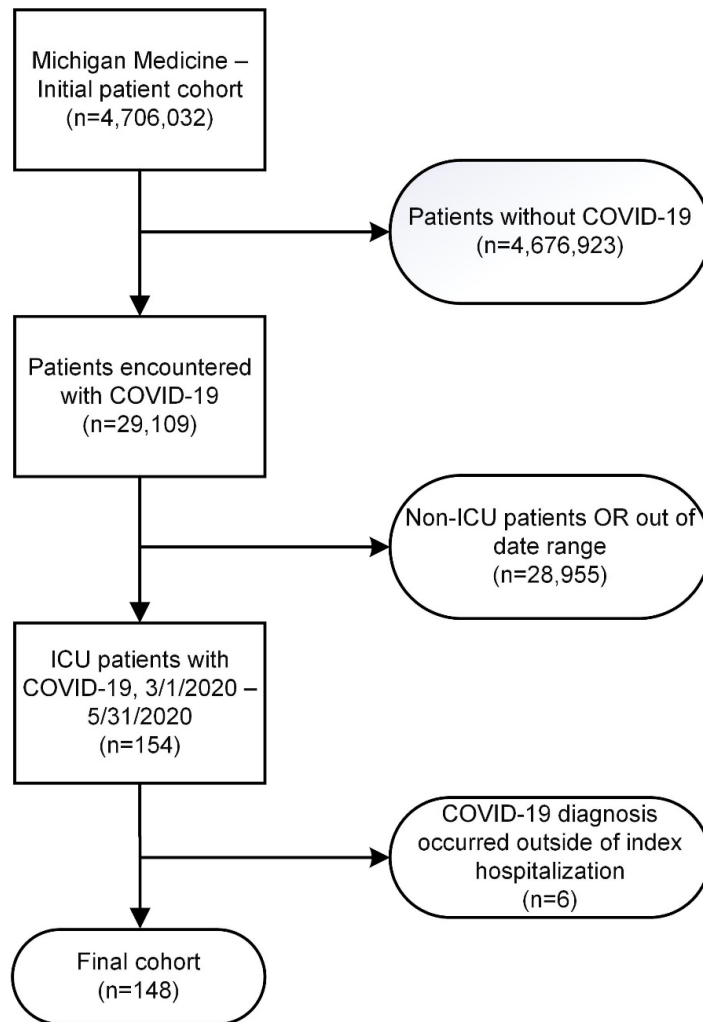

Study flow illustrated. In total, 148 patients were included for the final analysis.

**Supplemental Figure 2**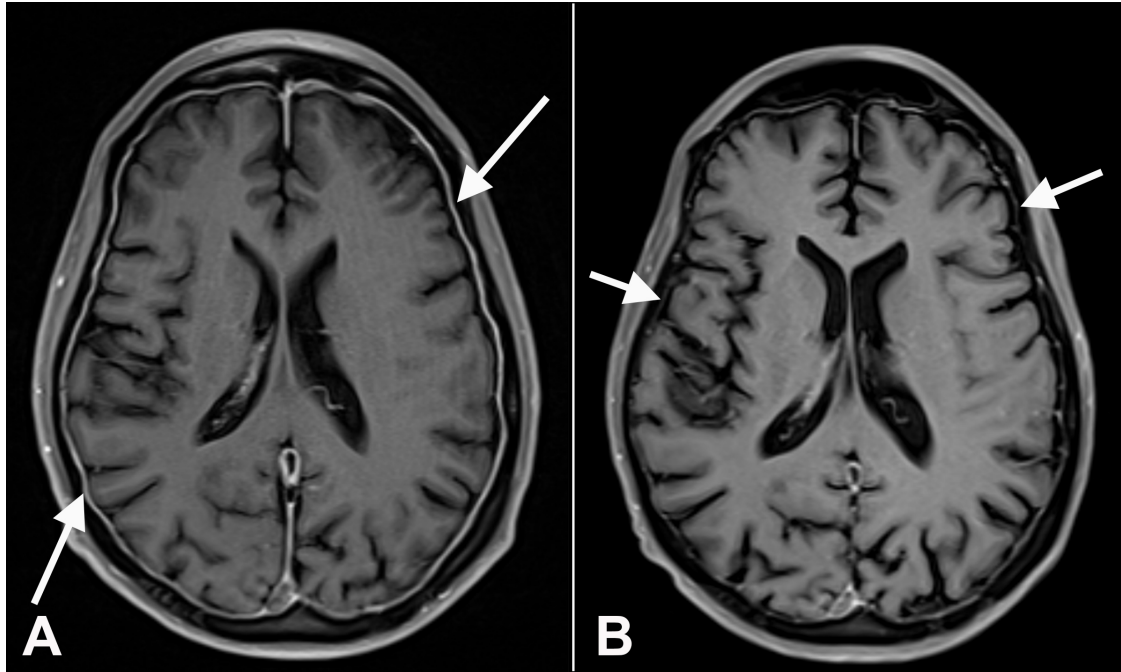

A, Axial T1 post-contrast with fat suppression images at the level of the mid lateral ventricles demonstrate smooth dural enhancement (arrows) along the bilateral cerebral convexities. B, This feature resolves one month later (arrows). The overall pattern of dura-arachnoid/pachymeningeal enhancement is non-specific, can be seen with intracranial hypotension, in the procedural setting (e.g., lumbar puncture), and other scenarios (e.g., infection, inflammation).

## Supplemental Figure 3

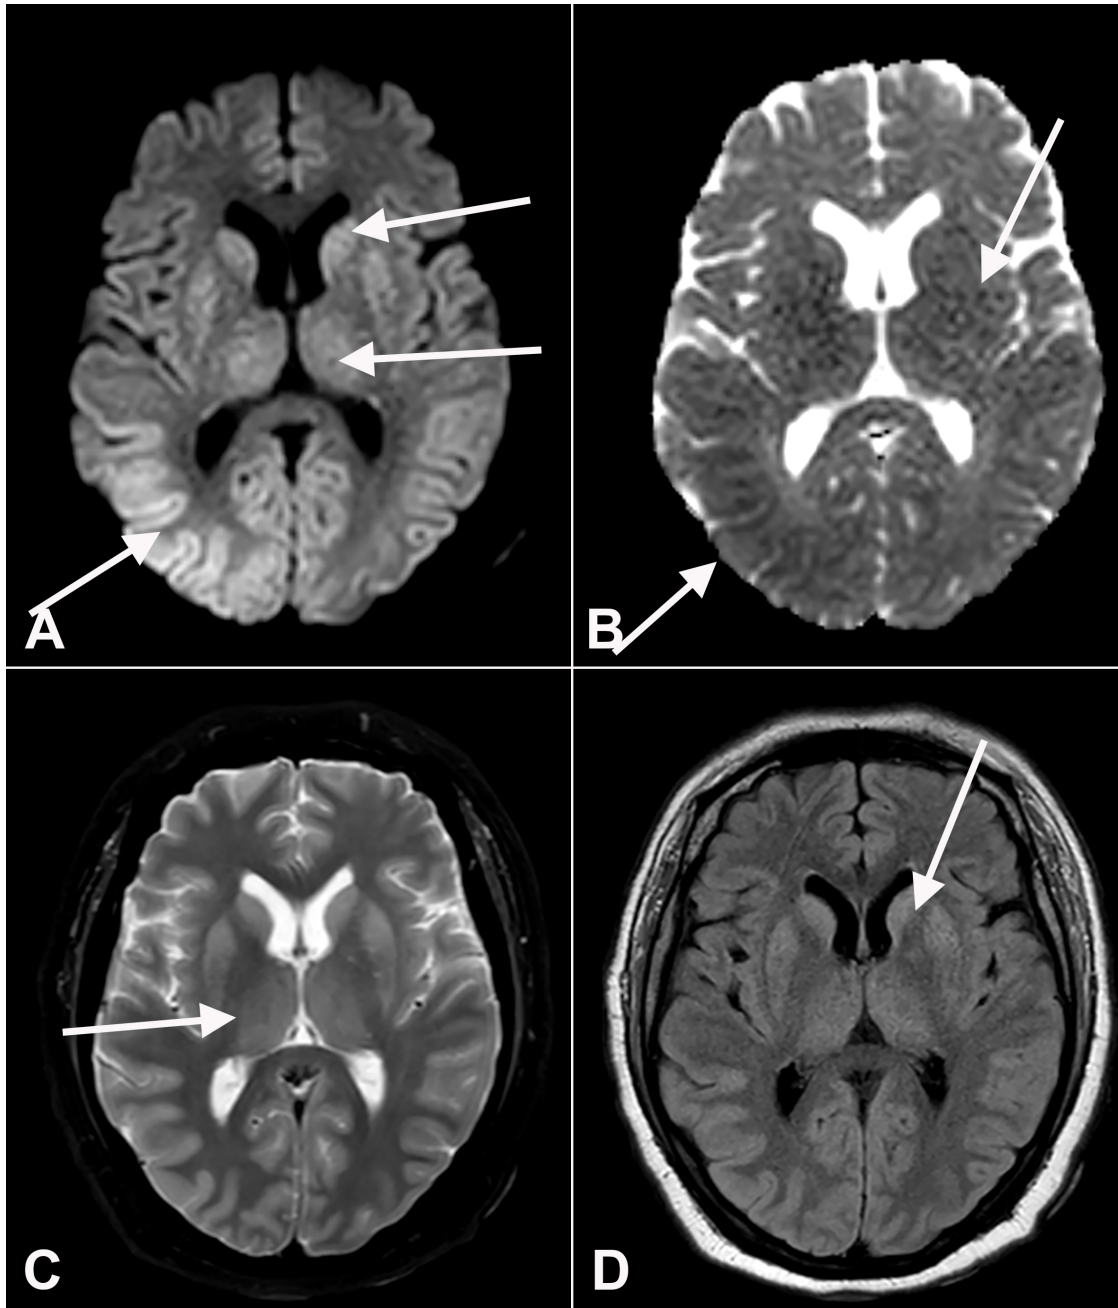

After initial non-contrast head CT (which was unremarkable), the patient had diffuse parenchymal abnormalities on MRI examination. A, Axial diffusion-weighted imaging shows hyperintense signal (arrows) at the bilateral basal ganglia, thalami, and posterior cortices, regions are hypointense (arrows)

on corresponding apparent diffusion coefficient map (B). These same locations are hyperintense on T2 (C) and FLAIR (D), especially at the basal ganglia and thalami.



**Supplemental Figure 4**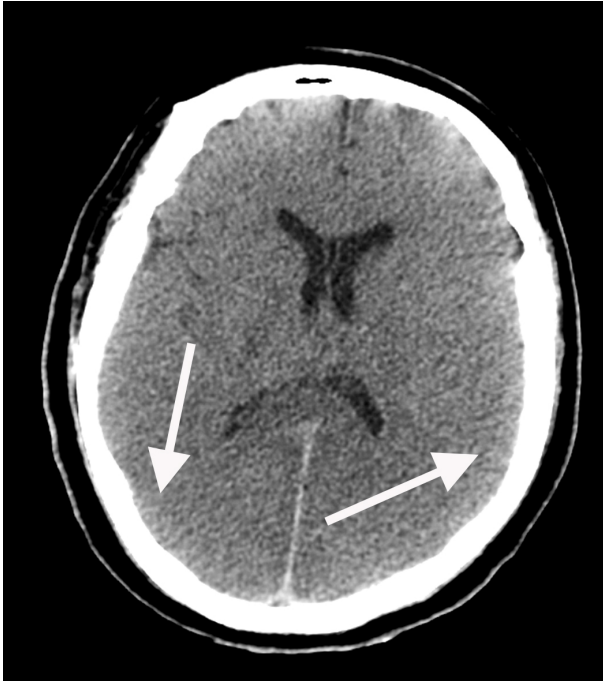

Non-contrast head CT performed approximately two weeks after cardiopulmonary arrest shows poor sulcation (arrows) bilaterally, suggesting global insult, most likely hypoxic-ischemic in etiology
